# Supplementary material
Source: MDPI journal article supplement (https://www.mdpi.com/2076-3417/9/24/5566)
Supplement: s1 [file s1]

**Have you always lived in this village?**

- Yes
- No

**How long did you live in this place?**

- Less than 1 year
- 1 to 2 years
- 3 to 10 years
- 11 to 20 years
- 21 to 30 years
- 31 to 40 years
- More than 40 years
- Always

**How many people currently live in this house (dwelling)?**

- Only the interviewee
- 2 people
- 3 to 4 people
- 5 to 6 people
- 7 or more people

**How long have you and your family lived in this house?**

- Less than 1 year
- 1 to 2 years
- 3 to 10 years
- 11 to 20 years
- 21 to 30 years
- 31 to 40 years
- More than 40 years
- Since you were born

**How do you rate the quality of your sleep?**

- Very good
- Good
- Moderate
- Bad
- Very bad

**Are you in the habit of waking up at night?**

- Yes
- No

**Do you use any sleeping medication?**

- Yes
- No
- Rarely

**What is your current employment/occupation? \_\_\_\_\_.**

**How long have you been working in this employment/occupation? \_\_\_\_\_.**

**What was your previous employment/occupation? \_\_\_\_\_.**

**How long have you worked in this employment/occupation? \_\_\_\_\_.**



## Termo de Consentimento Informado

**Título do Projeto:** Os impactes da poluição sonora de baixa frequência na qualidade de vida e na sustentabilidade dos lugares: estudo do tipo expostos e não-expostos no município de Guimarães.

**Enquadramento:** Esta investigação enquadra-se no âmbito de uma tese de doutoramento desenvolvida no Departamento de Geografia da Universidade do Minho.

### Explicação da Pesquisa:

Esta pesquisa tem por objetivo investigar quais os impactes do ruído de baixa frequência na qualidade de vida e na sustentabilidade dos lugares. A fonte de emissão que se considera para este estudo são os postes e linhas de alta tensão presentes em áreas residenciais no município de Guimarães, Portugal. Para aferir estes impactes consideram-se dois grupos de exposição: os 'expostos' ou 'próximo da fonte' a freguesia de Serzedelo, e os 'não-expostos' ou 'distante da fonte' a freguesia de São Tomé de Abação. Consideram-se estas duas freguesias por possuírem características urbanas similares e distinguem-se por uma ter elevada concentração de linhas e postes de alta tensão em seu território e a outra estar livre da passagem destas infraestruturas. Os testes audiométricos permitirão compreender de forma pormenorizada os impactes deste tipo de exposição na qualidade de vida da população, bem com, complementar outros eixos determinantes da pesquisa, nomeadamente, a componente mais objetiva, os níveis sonoros medidos, e a componente mais subjetiva, os inquéritos com questões relativas aos hábitos alimentares, estilo de vida, ambientes, exposição ao ruído e etc.

Os ensaios audiométricos serão realizados no Laboratório de Ergonomia da Universidade do Minho.

**Confidencialidade e Anonimato:** Todos os dados obtidos nesta pesquisa serão utilizados, unicamente, para fins académicos e permanecerão confidenciais.

Esta pesquisa tem como responsáveis a Dr<sup>a</sup>. Paula Remoaldo, Dr<sup>a</sup>. Lúcia Torres Silva e o Dr. Pedro Arezes, professores da Universidade do Minho e Juliana Araújo Alves aluna de doutoramento da referida universidade.

Eu, abaixo assinado(a), concordo em participar desta pesquisa. Declaro que fui devidamente informado(a) e esclarecido(a) sobre as etapas deste estudo, sobre os procedimentos e técnicas utilizados durante os ensaios. Foi-me ainda resguardado(a) a confidencialidade e o anonimato. Declaro que autorizo o uso das informações obtidas nos ensaios para fins científicos.

Assinatura: carlos remal Lúcia Torres Silva

Data: 14 / 03 / 2017

## Avaliação da percepção da incomodidade devida ao ruído

| Nome completo                                                                                                                             | Carlos Manuel Ribeiro de Sousa |          |                           | Idade:            | 45                  |  |  |  |  |   |
|-------------------------------------------------------------------------------------------------------------------------------------------|--------------------------------|----------|---------------------------|-------------------|---------------------|--|--|--|--|---|
| Profissão atual                                                                                                                           | Construção civil               |          |                           | Há quantos anos?  | 2008 → 2017         |  |  |  |  |   |
| Profissão anterior                                                                                                                        | Serebapica                     |          |                           | Por quantos anos? | 15 anos             |  |  |  |  |   |
| Indique com (X) qual é o seu grau de concordância com cada uma das afirmações:                                                            |                                |          |                           |                   |                     |  |  |  |  |   |
|                                                                                                                                           | Discordo totalmente            | Discordo | Não concordo nem discordo | Concordo          | Concordo totalmente |  |  |  |  |   |
| 1. Eu normalmente ouço bem.                                                                                                               |                                |          |                           |                   |                     |  |  |  |  | X |
| 2. Sinto-me incomodado(a) pelo ruído no meu dia-a-dia.                                                                                    | X                              |          |                           |                   |                     |  |  |  |  |   |
| 3. O ruído tem afetado a minha vida (por exemplo: o sono e a concentração).                                                               | X                              |          |                           |                   |                     |  |  |  |  |   |
| 4. Desperto facilmente ao mínimo ruído.                                                                                                   |                                |          |                           |                   |                     |  |  |  |  | X |
| 5. Habituo-me facilmente à maior parte dos ruídos.                                                                                        |                                |          |                           |                   |                     |  |  |  |  | X |
| 6. Sinto-me irritado(a) com o ruído.                                                                                                      | X                              |          |                           |                   |                     |  |  |  |  |   |
| 7. Sinto-me incomodado(a) com o ruído proveniente do exterior da minha residência (por exemplo, da passagem dos veículos e dos vizinhos). | X                              |          |                           |                   |                     |  |  |  |  |   |
| 8. Sinto dificuldade em concentrar-me em ambientes ruidosos.                                                                              | X                              |          |                           |                   |                     |  |  |  |  |   |
| 9. Sinto dificuldade em relaxar em ambientes ruidosos.                                                                                    | X                              |          |                           |                   |                     |  |  |  |  |   |
| 10. Tenho consciência acerca dos impactes do ruído na minha saúde.                                                                        |                                |          |                           |                   |                     |  |  |  |  | X |

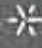

Determinação do Limiar de Audição

Ensaio nº: 1 Data: 14/03/17 Grupo:  Expostos  Não-Expostos

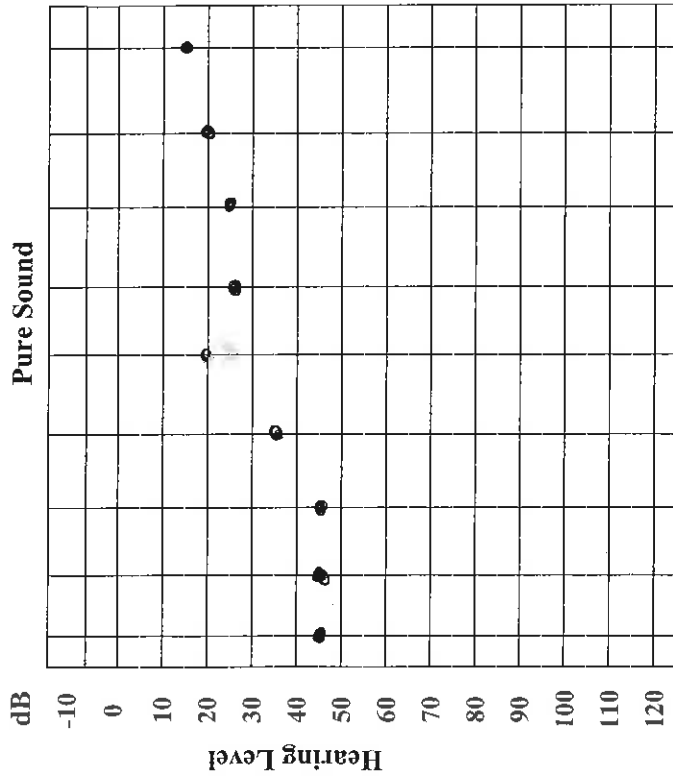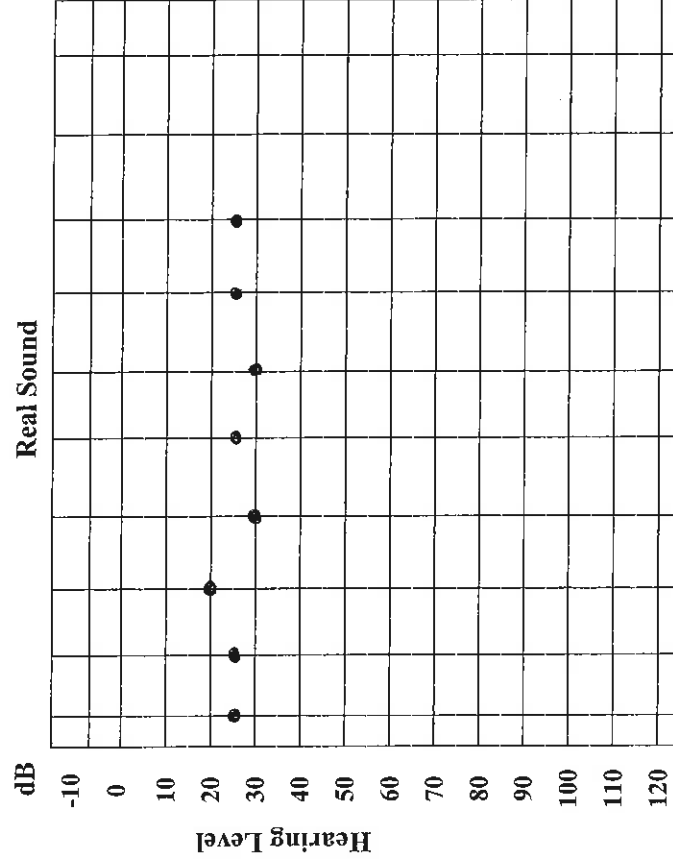

18 21 24 30 39 51 60 80 90  
Frequency (Hz)

Total Frequency Real Sound

|  |
|--|
|  |
|  |
|  |
|  |

Ensaio n.º: 1 Data: 14/03/19 Grupo:  Expostos  Não-expostos

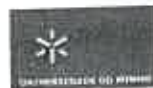

1. Que tipo de ruído escutou? (por exemplo: zumbido, faiscar).

Buzina de

2. Como descreve o tipo de ruído que acabou de ouvir?

RUÍDO

3. Pode descrever o tipo de incómodo que este ruído provoca? (por exemplo: fadiga, irritação, sonolência).

VAZTO

Obrigada pela sua participação!

## MINI EXAME DO ESTADO MENTAL

12

NOME: CARLOS MANUEL RIBEIRO DE SOUZA  
IDADE: 45 Anos ESCOLARIDADE: 4<sup>o</sup> CURSO Data: 14/03/2017

### 1 - ORIENTAÇÃO (1 ponto por cada resposta correcta)

Em que ano estamos? 2017  
Em que mês estamos? |  
Em que dia do mês estamos? |  
Em que dia da semana estamos? |  
Em que estação do ano estamos? |  
Em que país estamos? |  
Em que distrito vive? |  
Em que terra vive? |  
Em que casa estamos? |  
Em que andar estamos? |

Nota: 10

### 2 - RETENÇÃO (contar 1 ponto por cada resposta correctamente repetida)

"Vou dizer três palavras, queria que as repetisse mas só depois de eu as dizer todas; procure ficar a sabê-las de cor"

Pêra |  
Gato |  
Bola |

Nota: 3

### 3 - ATENÇÃO E CÁLCULO (contar 1 ponto por cada resposta correcta. Se der uma resposta errada mas depois continuar a subtrair bem, consideram-se as seguintes como correctas. Parar ao fim de 5 respostas.)

"Agora peço-lhe que me diga quantos são 30 menos 3 e depois ao número encontrado voltar a tirar 3 e repete assim até eu dizer para parar".

27 | 24 | 21 | 18 | 15 |

Nota: 5

### 4 - EVOCAÇÃO (1 ponto por cada resposta correcta.)

"Veja se consegue dizer as três palavras que pedi há pouco para decorar"

Pêra |  
Gato |  
Bola |

Nota: 3

## Termo de Consentimento Informado

**Título do Projeto:** Os impactes da poluição sonora de baixa frequência na qualidade de vida e na sustentabilidade dos lugares: estudo do tipo expostos e não-expostos no município de Guimarães.

**Enquadramento:** Esta investigação enquadra-se no âmbito de uma tese de doutoramento desenvolvida no Departamento de Geografia da Universidade do Minho.

### Explicação da Pesquisa:

Esta pesquisa tem por objetivo investigar quais os impactes do ruído de baixa frequência na qualidade de vida e na sustentabilidade dos lugares. A fonte de emissão que se considera para este estudo são os postes e linhas de alta tensão presentes em áreas residenciais no município de Guimarães, Portugal. Para aferir estes impactes consideram-se dois grupos de exposição: os 'expostos' ou 'próximo da fonte' a freguesia de Serzedelo, e os 'não-expostos' ou 'distante da fonte' a freguesia de São Tomé de Abação. Consideram-se estas duas freguesias por possuírem características urbanas similares e distinguem-se por uma ter elevada concentração de linhas e postes de alta tensão em seu território e a outra estar livre da passagem destas infraestruturas. Os testes audiométricos permitirão compreender de forma pormenorizada os impactes deste tipo de exposição na qualidade de vida da população, bem com, complementar outros eixos determinantes da pesquisa, nomeadamente, a componente mais objetiva, os níveis sonoros medidos, e a componente mais subjetiva, os inquéritos com questões relativas aos hábitos alimentares, estilo de vida, ambientes, exposição ao ruído e etc.

Os ensaios audiométricos serão realizados no Laboratório de Ergonomia da Universidade do Minho.

**Confidencialidade e Anonimato:** Todos os dados obtidos nesta pesquisa serão utilizados, unicamente, para fins académicos e permanecerão confidenciais.

Esta pesquisa tem como responsáveis a Dr<sup>a</sup>. Paula Remoaldo, Dr<sup>a</sup>. Lígia Torres Silva e o Dr. Pedro Arezes, professores da Universidade do Minho e Juliana Araújo Alves aluna de doutoramento da referida universidade.

Eu, abaixo assinado(a), concordo em participar desta pesquisa. Declaro que fui devidamente informado(a) e esclarecido(a) sobre as etapas deste estudo, sobre os procedimentos e técnicas utilizados durante os ensaios. Foi-me ainda resguardado(a) a confidencialidade e o anonimato. Declaro que autorizo o uso das informações obtidas nos ensaios para fins científicos.

Assinatura: Carlos Simão Sousa da Cunha  
Data: 14 / 03 / 2017



## Avaliação da percepção da incomodidade devida ao ruído

| Nome completo                                                                                                                             | Carlos Simões Sousa de Coimbra | Idade:            | 44 (44) | Concordo Totalmente | Concordo | Discordo | Discordo totalmente |
|-------------------------------------------------------------------------------------------------------------------------------------------|--------------------------------|-------------------|---------|---------------------|----------|----------|---------------------|
| Profissão atual                                                                                                                           | Desempregado                   | Há quantos anos?  | 10 anos | Discordo            | Concordo | Discordo | Discordo totalmente |
| Profissão anterior                                                                                                                        | Construção civil               | Por quantos anos? | 5 anos  | Discordo            | Concordo | Discordo | Discordo totalmente |
| Indique com (X) qual é o seu grau de concordância com cada uma das afirmações:                                                            |                                |                   |         |                     |          |          |                     |
| 1. Eu normalmente ouço bem.                                                                                                               |                                |                   |         |                     |          |          | X                   |
| 2. Sinto-me incomodado(a) pelo ruído no meu dia-a-dia.                                                                                    |                                |                   |         |                     |          |          | X                   |
| 3. O ruído tem afetado a minha vida (por exemplo: o sono e a concentração).                                                               |                                |                   |         |                     |          |          | X                   |
| 4. Desperto facilmente ao mínimo ruído.                                                                                                   |                                |                   |         |                     |          |          | X                   |
| 5. Habituo-me facilmente à maior parte dos ruídos.                                                                                        |                                |                   |         |                     |          |          | X                   |
| 6. Sinto-me irritado(a) com o ruído.                                                                                                      |                                |                   |         |                     |          |          | X                   |
| 7. Sinto-me incomodado(a) com o ruído proveniente do exterior da minha residência (por exemplo, da passagem dos veículos e dos vizinhos). |                                |                   |         |                     |          |          | X                   |
| 8. Sinto dificuldade em concentrar-me em ambientes ruidosos.                                                                              |                                |                   |         |                     |          |          | X                   |
| 9. Sinto dificuldade em relaxar em ambientes ruidosos.                                                                                    |                                |                   |         |                     |          |          | X                   |
| 10. Tenho consciência acerca dos impactes do ruído na minha saúde.                                                                        |                                |                   |         |                     |          |          | X                   |

Determinação do Limiar de Audição

Ensaio nº: Z      Data: 14/3/17      Grupo:  Expostos       Não-Expostos

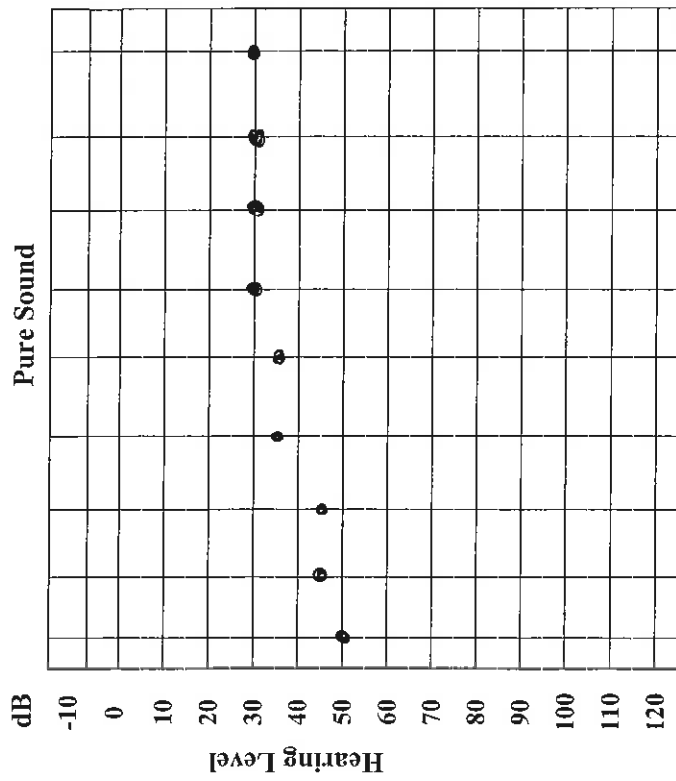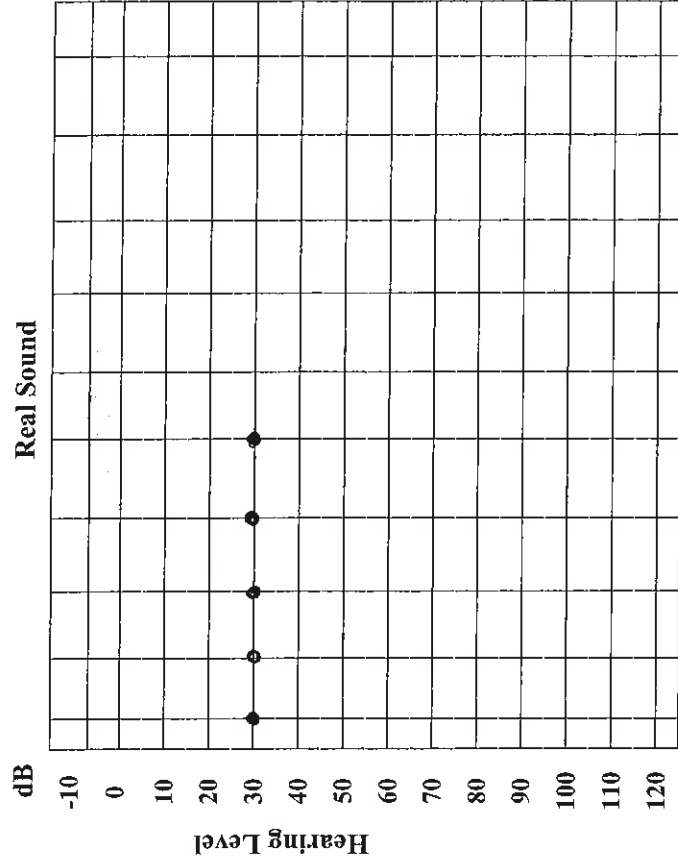

18 21 24 30 39 51 60 80 90  
Frequency (Hz)

Total Frequency Real Sound

|  |
|--|
|  |
|  |
|  |
|  |

Ensaio n.º: 2 Data: 14/3/11 Grupo:  Expostos  Não-expostos

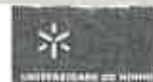

1. Que tipo de ruído escutou? (por exemplo: zumbido, faiscar).

ESTALOS

2. Como descreve o tipo de ruído que acabou de ouvir?

ZUMBIDO EM ESTALOS

3. Pode descrever o tipo de incómodo que este ruído provoca? (por exemplo: fadiga, irritação, sonolência).

NÃO INCOMODO

Obrigada pela sua participação!

# MINI EXAME DO ESTADO MENTAL

2º

NOME: CARLOS JOSÉ DA CUNHA

IDADE: 44 Anos ESCOLARIDADE: 2º curso Data: 14/03/2017

## 1 - ORIENTAÇÃO (1 ponto por cada resposta correcta)

Em que ano estamos? 2006  
Em que mês estamos? —  
Em que dia do mês estamos? 1  
Em que dia da semana estamos? 1  
Em que estação do ano estamos? —  
Em que país estamos? 1  
Em que distrito vive? —  
Em que terra vive? 1  
Em que casa estamos? 1  
Em que andar estamos? —

Nota: 5

## 2 - RETENÇÃO (contar 1 ponto por cada resposta correctamente repetida)

"Vou dizer três palavras, queria que as repetisse mas só depois de eu as dizer todas; procure ficar a sabê-las de cor"

Pêra 1  
Gato 1  
Bola 1

Nota: 3

## 3 - ATENÇÃO E CÁLCULO (contar 1 ponto por cada resposta correcta. Se der uma resposta errada mas depois continuar a subtrair bem, consideram-se as seguintes como correctas. Parar ao fim de 5 respostas.)

"Agora peço-lhe que me diga quantos são 30 menos 3 e depois ao número encontrado voltar a tirar 3 e repete assim até eu dizer para parar".

27 — 24 — 21 — 18 — 15 —

Nota: 0

## 4 - EVOCAÇÃO (1 ponto por cada resposta correcta.)

"Veja se consegue dizer as três palavras que pedi há pouco para decorar".

Pêra 1  
Gato 1  
Bola 1

Nota: 3

## Termo de Consentimento Informado

**Título do Projeto:** Os impactes da poluição sonora de baixa frequência na qualidade de vida e na sustentabilidade dos lugares: estudo do tipo expostos e não-expostos no município de Guimarães.

**Enquadramento:** Esta investigação enquadra-se no âmbito de uma tese de doutoramento desenvolvida no Departamento de Geografia da Universidade do Minho.

**Explicação da Pesquisa:**

Esta pesquisa tem por objetivo investigar quais os impactes do ruído de baixa frequência na qualidade de vida e na sustentabilidade dos lugares. A fonte de emissão que se considera para este estudo são os postes e linhas de alta tensão presentes em áreas residenciais no município de Guimarães, Portugal. Para aferir estes impactes consideram-se dois grupos de exposição: os 'expostos' ou 'próximo da fonte' a freguesia de Serzedelo, e os 'não-expostos' ou 'distante da fonte' a freguesia de São Tomé de Abação. Consideram-se estas duas freguesias por possuírem características urbanas similares e distinguem-se por uma ter elevada concentração de linhas e postes de alta tensão em seu território e a outra estar livre da passagem destas infraestruturas. Os testes audiométricos permitirão compreender de forma pormenorizada os impactes deste tipo de exposição na qualidade de vida da população, bem com, complementar outros eixos determinantes da pesquisa, nomeadamente, a componente mais objetiva, os níveis sonoros medidos, e a componente mais subjetiva, os inquéritos com questões relativas aos hábitos alimentares, estilo de vida, ambientes, exposição ao ruído e etc.

Os ensaios audiométricos serão realizados no Laboratório de Ergonomia da Universidade do Minho.

**Confidencialidade e Anonimato:** Todos os dados obtidos nesta pesquisa serão utilizados, unicamente, para fins académicos e permanecerão confidenciais.

Esta pesquisa tem como responsáveis a Dr<sup>a</sup>. Paula Remoaldo, Dr<sup>a</sup>. Lúgia Torres Silva e o Dr. Pedro Arezes, professores da Universidade do Minho e Juliana Araújo Alves aluna de doutoramento da referida universidade.

Eu, abaixo assinado(a), concordo em participar desta pesquisa. Declaro que fui devidamente informado(a) e esclarecido(a) sobre as etapas deste estudo, sobre os procedimentos e técnicas utilizados durante os ensaios. Foi-me ainda resguardado(a) a confidencialidade e o anonimato. Declaro que autorizo o uso das informações obtidas nos ensaios para fins científicos.

Assinatura:

Alvaro Costa Faria

Data: 14/03/2017

## Avaliação da percepção da incomodidade devida ao ruído

| Nome completo                                                                                                                             | Alcindo Costa Faria |  | Idade:            | 49      | Concordo Totalmente | Concordo | Não concordo nem discordo | Discordo | Discordo totalmente |
|-------------------------------------------------------------------------------------------------------------------------------------------|---------------------|--|-------------------|---------|---------------------|----------|---------------------------|----------|---------------------|
| Profissão atual                                                                                                                           | Desempregado        |  | Há quantos anos?  | 10 anos |                     |          |                           |          |                     |
| Profissão anterior                                                                                                                        | Textil              |  | Por quantos anos? | 20 anos |                     |          |                           |          |                     |
| Indique com (X) qual é o seu grau de concordância com cada uma das afirmações:                                                            |                     |  |                   |         |                     |          |                           |          |                     |
| 1. Eu normalmente ouço bem.                                                                                                               |                     |  |                   |         |                     | X        |                           |          |                     |
| 2. Sinto-me incomodado(a) pelo ruído no meu dia-a-dia.                                                                                    |                     |  |                   |         |                     |          |                           |          |                     |
| 3. O ruído tem afetado a minha vida (por exemplo: o sono e a concentração).                                                               |                     |  |                   |         |                     | X        |                           |          |                     |
| 4. Desperto facilmente ao mínimo ruído.                                                                                                   |                     |  |                   |         |                     | X        |                           |          |                     |
| 5. Habituo-me facilmente à maior parte dos ruídos.                                                                                        |                     |  |                   |         |                     | X        |                           |          |                     |
| 6. Sinto-me irritado(a) com o ruído.                                                                                                      |                     |  |                   |         |                     |          |                           |          |                     |
| 7. Sinto-me incomodado(a) com o ruído proveniente do exterior da minha residência (por exemplo, da passagem dos veículos e dos vizinhos). |                     |  |                   |         |                     |          |                           |          |                     |
| 8. Sinto dificuldade em concentrar-me em ambientes ruidosos.                                                                              |                     |  |                   |         |                     |          |                           |          |                     |
| 9. Sinto dificuldade em relaxar em ambientes ruidosos.                                                                                    |                     |  |                   |         |                     |          |                           |          |                     |
| 10. Tenho consciência acerca dos impactes do ruído na minha saúde.                                                                        |                     |  |                   |         |                     |          | X                         |          |                     |

Determinação do Limiar de Audição

Ensaio n°: 3

Data: 4/03/17

Grupo:  Expostos  Não-Expostos

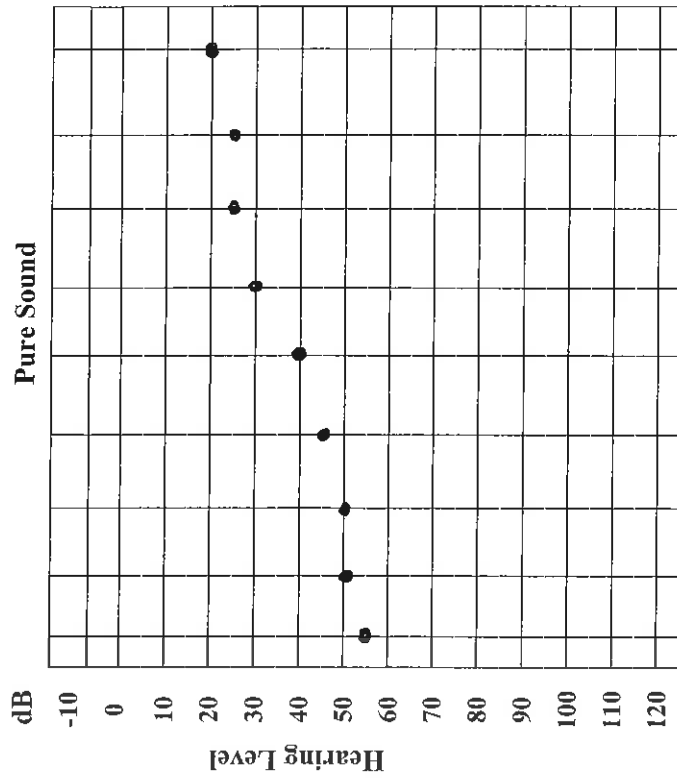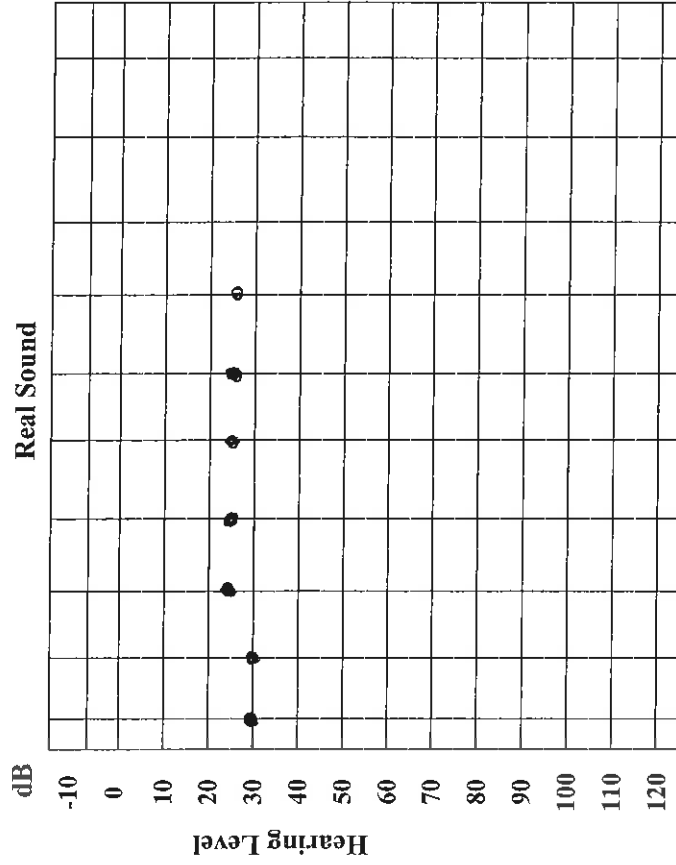

18 21 24 30 39 51 60 80 90  
Frequency (Hz)

Total Frequency Real Sound

|  |
|--|
|  |
|  |
|  |
|  |

Ensaio n.º: \_\_\_\_\_ Data: \_\_\_\_\_ Grupo:  Expostos  Não-expostos

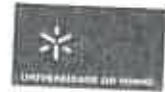

1. Que tipo de ruído escutou? (por exemplo: zumbido, faiscar).

Zumbido

2. Como descreve o tipo de ruído que acabou de ouvir?

de um mau

3. Pode descrever o tipo de incómodo que este ruído provoca? (por exemplo: fadiga, irritação, sonolência).

Não incomodou

Obrigada pela sua participação!



## MINI EXAME DO ESTADO MENTAL

32

NOME: ALCINO COSTA FERREIRA

IDADE: 49 Anos ESCOLARIDADE: 6ª Data: 14/03/2017

### 1 - ORIENTAÇÃO (1 ponto por cada resposta correcta)

Em que ano estamos? 1  
Em que mês estamos? 1  
Em que dia do mês estamos? 1  
Em que dia da semana estamos? 1  
Em que estação do ano estamos? 1  
Em que país estamos? 1  
Em que distrito vive? 1  
Em que terra vive? 1  
Em que casa estamos? 1  
Em que andar estamos? 1

Nota: 10

### 2 - RETENÇÃO (contar 1 ponto por cada resposta correctamente repetida)

"Vou dizer três palavras, queria que as repetisse mas só depois de eu as dizer todas; procure ficar a sabê-las de cor"

Pêra 1  
Gato 1  
Bola 1

Nota: 3

### 3 - ATENÇÃO E CÁLCULO (contar 1 ponto por cada resposta correcta. Se der uma resposta errada mas depois continuar a subtrair bem, consideram-se as seguintes como correctas. Parar ao fim de 5 respostas.)

"Agora peço-lhe que me diga quantos são 30 menos 3 e depois ao número encontrado voltar a tirar 3 e repete assim até eu dizer para parar".

27 1 24 1 21 1 18 1 15 1

Nota: 5

### 4 - EVOCACÃO (1 ponto por cada resposta correcta.)

"Veja se consegue dizer as três palavras que pedi há pouco para decorar"

Pêra 1  
Gato 1  
Bola 1

Nota: 3

## Termo de Consentimento Informado

**Título do Projeto:** Os impactes da poluição sonora de baixa frequência na qualidade de vida e na sustentabilidade dos lugares: estudo do tipo expostos e não-expostos no município de Guimarães.

**Enquadramento:** Esta investigação enquadra-se no âmbito de uma tese de doutoramento desenvolvida no Departamento de Geografia da Universidade do Minho.

**Explicação da Pesquisa:**

Esta pesquisa tem por objetivo investigar quais os impactes do ruído de baixa frequência na qualidade de vida e na sustentabilidade dos lugares. A fonte de emissão que se considera para este estudo são os postes e linhas de alta tensão presentes em áreas residenciais no município de Guimarães, Portugal. Para aferir estes impactes consideram-se dois grupos de exposição: os 'expostos' ou 'próximo da fonte' a freguesia de Serzedelo, e os 'não-expostos' ou 'distante da fonte' a freguesia de São Tomé de Abação. Consideram-se estas duas freguesias por possuírem características urbanas similares e distinguírem-se por uma ter elevada concentração de linhas e postes de alta tensão em seu território e a outra estar livre da passagem destas infraestruturas. Os testes audiométricos permitirão compreender de forma pormenorizada os impactes deste tipo de exposição na qualidade de vida da população, bem com, complementar outros eixos determinantes da pesquisa, nomeadamente, a componente mais objetiva, os níveis sonoros medidos, e a componente mais subjetiva, os inquéritos com questões relativas aos hábitos alimentares, estilo de vida, ambientes, exposição ao ruído e etc.

Os ensaios audiométricos serão realizados no Laboratório de Ergonomia da Universidade do Minho.

**Confidencialidade e Anonimato:** Todos os dados obtidos nesta pesquisa serão utilizados, unicamente, para fins académicos e permanecerão confidenciais.

Esta pesquisa tem como responsáveis a Dr<sup>a</sup>. Paula Remoaldo, Dr<sup>a</sup>. Lígia Torres Silva e o Dr. Pedro Arezes, professores da Universidade do Minho e Juliana Araújo Alves aluna de doutoramento da referida universidade.

Eu, abaixo assinado(a), concordo em participar desta pesquisa. Declaro que fui devidamente informado(a) e esclarecido(a) sobre as etapas deste estudo, sobre os procedimentos e técnicas utilizados durante os ensaios. Foi-me ainda resguardado(a) a confidencialidade e o anonimato. Declaro que autorizo o uso das informações obtidas nos ensaios para fins científicos.

Assinatura: \_\_\_\_\_

Data: 14 / 03 / 2017

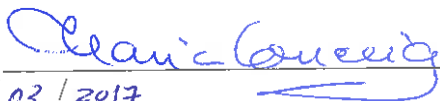

## Avaliação da percepção da incomodidade devida ao ruído

| Nome completo                                                                                                                             | Maria da Conceição  | Idade:            | 60                          | Concordo Totalmente       |                     |
|-------------------------------------------------------------------------------------------------------------------------------------------|---------------------|-------------------|-----------------------------|---------------------------|---------------------|
| Profissão atual                                                                                                                           | Doméstica           | Há quantos anos?  | completamente (por inteiro) | Concordo                  |                     |
| Profissão anterior                                                                                                                        | Conceição           | Por quantos anos? | 22 anos                     | Não concordo nem discordo |                     |
| Indique com (X) qual é o seu grau de concordância com cada uma das afirmações:                                                            | Discordo totalmente | Discordo          | Não concordo nem discordo   | Concordo                  | Concordo Totalmente |
| 1. Eu normalmente ouço bem.                                                                                                               |                     |                   |                             | X                         | X                   |
| 2. Sinto-me incomodado(a) pelo ruído no meu dia-a-dia.                                                                                    |                     | X                 |                             |                           |                     |
| 3. O ruído tem afetado a minha vida (por exemplo: o sono e a concentração).                                                               |                     | X                 |                             |                           |                     |
| 4. Desperto facilmente ao mínimo ruído.                                                                                                   |                     |                   |                             | X                         |                     |
| 5. Habituo-me facilmente à maior parte dos ruídos.                                                                                        |                     |                   |                             | X                         |                     |
| 6. Sinto-me irritado(a) com o ruído.                                                                                                      |                     |                   |                             | X                         |                     |
| 7. Sinto-me incomodado(a) com o ruído proveniente do exterior da minha residência (por exemplo, da passagem dos veículos e dos vizinhos). |                     | X                 |                             |                           |                     |
| 8. Sinto dificuldade em concentrar-me em ambientes ruidosos.                                                                              |                     | X                 |                             |                           |                     |
| 9. Sinto dificuldade em relaxar em ambientes ruidosos.                                                                                    |                     | X                 |                             |                           |                     |
| 10. Tenho consciência acerca dos impactes do ruído na minha saúde.                                                                        |                     |                   |                             | X                         |                     |

Determinação do Limiar de Audição

Ensaio nº.: 4 Data: 14/3/17 Grupo:  Expostos  Não-Expostos

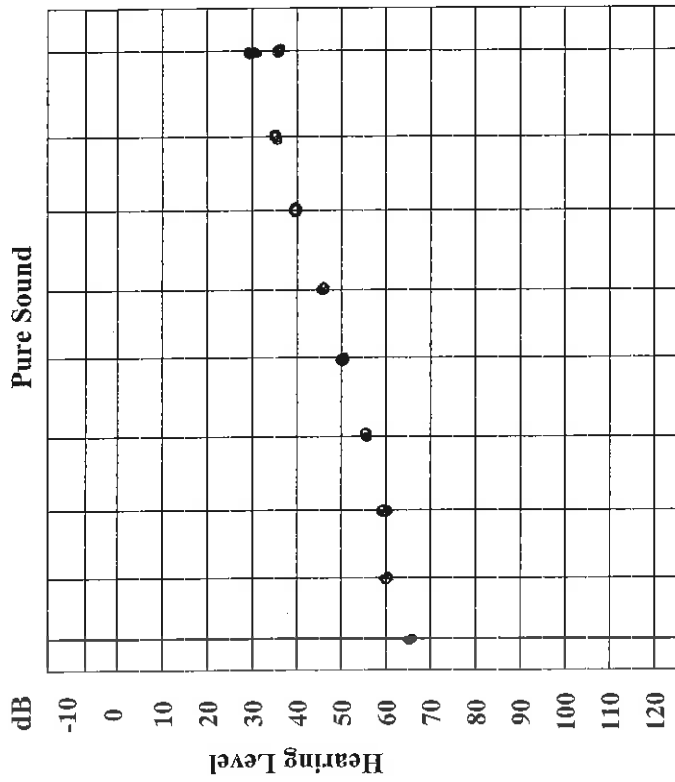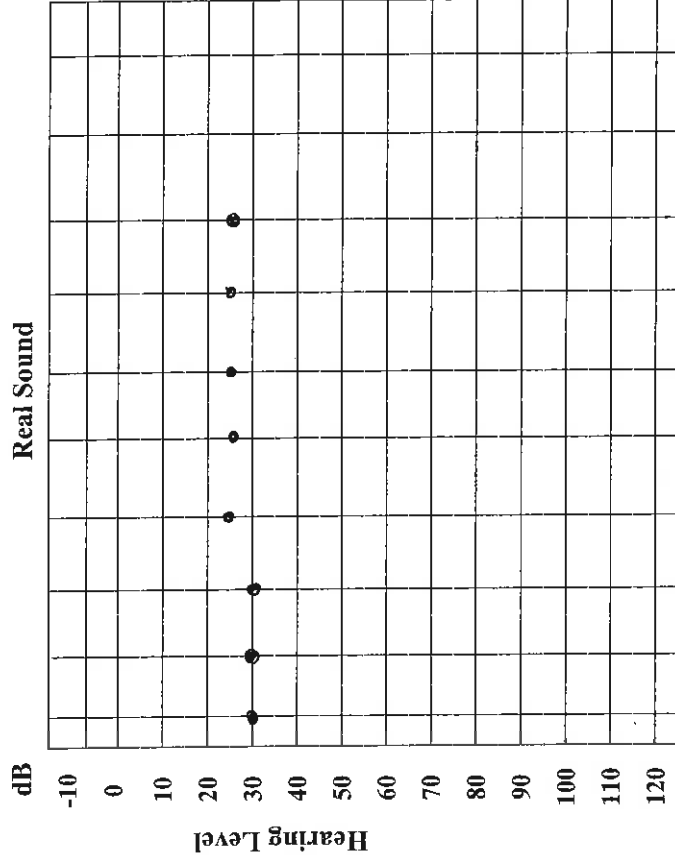

18 21 24 30 39 51 60 78 90  
Frequency (Hz)

Total Frequency Real Sound

|  |
|--|
|  |
|  |
|  |
|  |

UNIA DE GUARIGU

Ensaio n°: 4 Data: 14/03/17 Grupo:  Expostos  Não-expostos

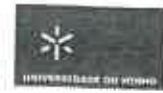

1. Que tipo de ruído escutou? (por exemplo: zumbido, faiscar).

zumbidos

2. Como descreve o tipo de ruído que acabou de ouvir?

Ondas do ar

3. Pode descrever o tipo de incômodo que este ruído provoca? (por exemplo: fadiga, irritação, sonolência).

Um pouco de sonolência

Obrigada pela sua participação!

# MINI EXAME DO ESTADO MENTAL

42

NOME: Maria da Graça  
IDADE: 60 Anos ESCOLARIDADE: 4º classe Data: 14/03/2017

## 1 - ORIENTAÇÃO (1 ponto por cada resposta correcta)

- Em que ano estamos? 1
- Em que mês estamos? 1
- Em que dia do mês estamos? 1
- Em que dia da semana estamos? 1
- Em que estação do ano estamos? 1
- Em que país estamos? 1
- Em que distrito vive? 1
- Em que terra vive? 1
- Em que casa estamos? 1
- Em que andar estamos? 1

Nota: 8

## 2 - RETENÇÃO (contar 1 ponto por cada resposta correctamente repetida)

- "Vou dizer três palavras, queria que as repetisse mas só depois de eu as dizer todas; procure ficar a sabê-las de cor"
- Pêra 1
  - Gato 1
  - Bola 1

Nota: 3

## 3 - ATENÇÃO E CÁLCULO (contar 1 ponto por cada resposta correcta. Se der uma resposta errada mas depois continuar a subtrair bem, consideram-se as seguintes como correctas. Parar ao fim de 5 respostas.)

- "Agora peço-lhe que me diga quantos são 30 menos 3 e depois ao número encontrado voltar a tirar 3 e repete assim até eu dizer para parar".
- 27 1 24 1 21 1 18 1 15 1

Nota: 5

## 4 - EVOCÇÃO (1 ponto por cada resposta correcta.)

- "Veja se consegue dizer as três palavras que pedi há pouco para decorar"
- Pêra 1
  - Gato 1
  - Bola 1

Nota: 1

## Termo de Consentimento Informado

**Título do Projeto:** Os impactes da poluição sonora de baixa frequência na qualidade de vida e na sustentabilidade dos lugares: estudo do tipo expostos e não-expostos no município de Guimarães.

**Enquadramento:** Esta investigação enquadra-se no âmbito de uma tese de doutoramento desenvolvida no Departamento de Geografia da Universidade do Minho.

**Explicação da Pesquisa:**

Esta pesquisa tem por objetivo investigar quais os impactes do ruído de baixa frequência na qualidade de vida e na sustentabilidade dos lugares. A fonte de emissão que se considera para este estudo são os postes e linhas de alta tensão presentes em áreas residenciais no município de Guimarães, Portugal. Para aferir estes impactes consideram-se dois grupos de exposição: os 'expostos' ou 'próximo da fonte' a freguesia de Serzedelo, e os 'não-expostos' ou 'distante da fonte' a freguesia de São Tomé de Abação. Consideram-se estas duas freguesias por possuírem características urbanas similares e distinguem-se por uma ter elevada concentração de linhas e postes de alta tensão em seu território e a outra estar livre da passagem destas infraestruturas. Os testes audiométricos permitirão compreender de forma pormenorizada os impactes deste tipo de exposição na qualidade de vida da população, bem com, complementar outros eixos determinantes da pesquisa, nomeadamente, a componente mais objetiva, os níveis sonoros medidos, e a componente mais subjetiva, os inquéritos com questões relativas aos hábitos alimentares, estilo de vida, ambientes, exposição ao ruído e etc.

Os ensaios audiométricos serão realizados no Laboratório de Ergonomia da Universidade do Minho.

**Confidencialidade e Anonimato:** Todos os dados obtidos nesta pesquisa serão utilizados, unicamente, para fins académicos e permanecerão confidenciais.

Esta pesquisa tem como responsáveis a Dr<sup>a</sup>. Paula Remoaldo, Dr<sup>a</sup>. Lígia Torres Silva e o Dr. Pedro Arezes, professores da Universidade do Minho e Juliana Araújo Alves aluna de doutoramento da referida universidade.

Eu, abaixo assinado(a), concordo em participar desta pesquisa. Declaro que fui devidamente informado(a) e esclarecido(a) sobre as etapas deste estudo, sobre os procedimentos e técnicas utilizados durante os ensaios. Foi-me ainda resguardado(a) a confidencialidade e o anonimato. Declaro que autorizo o uso das informações obtidas nos ensaios para fins científicos.

Assinatura: Belmício ALVES Ribcino

Data: 14 / 03 / 2017

## Avaliação da percepção da incomodidade devida ao ruído

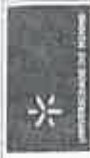

|                                                                                                                                           |                            |                 |                                  |                 |                            |
|-------------------------------------------------------------------------------------------------------------------------------------------|----------------------------|-----------------|----------------------------------|-----------------|----------------------------|
| Nome completo                                                                                                                             | Belmiro Alves Ribeiro      |                 | Idade:                           | 45              |                            |
| Profissão atual                                                                                                                           | Motorista                  |                 | Há quantos anos?                 | 10 anos         |                            |
| Profissão anterior                                                                                                                        | Textel (operador)          |                 | Por quantos anos?                | 30 anos         |                            |
| <b>Indique com (X) qual é o seu grau de concordância com cada uma das afirmações:</b>                                                     | <b>Discordo totalmente</b> | <b>Discordo</b> | <b>Não concordo nem discordo</b> | <b>Concordo</b> | <b>Concordo Totalmente</b> |
| 1. Eu normalmente ouço bem.                                                                                                               |                            |                 |                                  | X               |                            |
| 2. Sinto-me incomodado(a) pelo ruído no meu dia-a-dia.                                                                                    |                            |                 |                                  | X               |                            |
| 3. O ruído tem afetado a minha vida (por exemplo: o sono e a concentração).                                                               |                            | X               |                                  |                 |                            |
| 4. Desperto facilmente ao mínimo ruído.                                                                                                   |                            |                 |                                  | X               |                            |
| 5. Habituo-me facilmente à maior parte dos ruídos.                                                                                        |                            |                 |                                  | X               |                            |
| 6. Sinto-me irritado(a) com o ruído.                                                                                                      |                            |                 |                                  | X               |                            |
| 7. Sinto-me incomodado(a) com o ruído proveniente do exterior da minha residência (por exemplo, da passagem dos veículos e dos vizinhos). |                            |                 |                                  | X               |                            |
| 8. Sinto dificuldade em concentrar-me em ambientes ruidosos.                                                                              |                            |                 |                                  | X               |                            |
| 9. Sinto dificuldade em relaxar em ambientes ruidosos.                                                                                    |                            |                 |                                  | X               |                            |
| 10. Tenho consciência acerca dos impactes do ruído na minha saúde.                                                                        |                            |                 |                                  | X               |                            |



Determinação do Limiar de Audição

Ensaio n.º: 5 Data: 14/3/17 Grupo:  Expostos  Não-Expostos

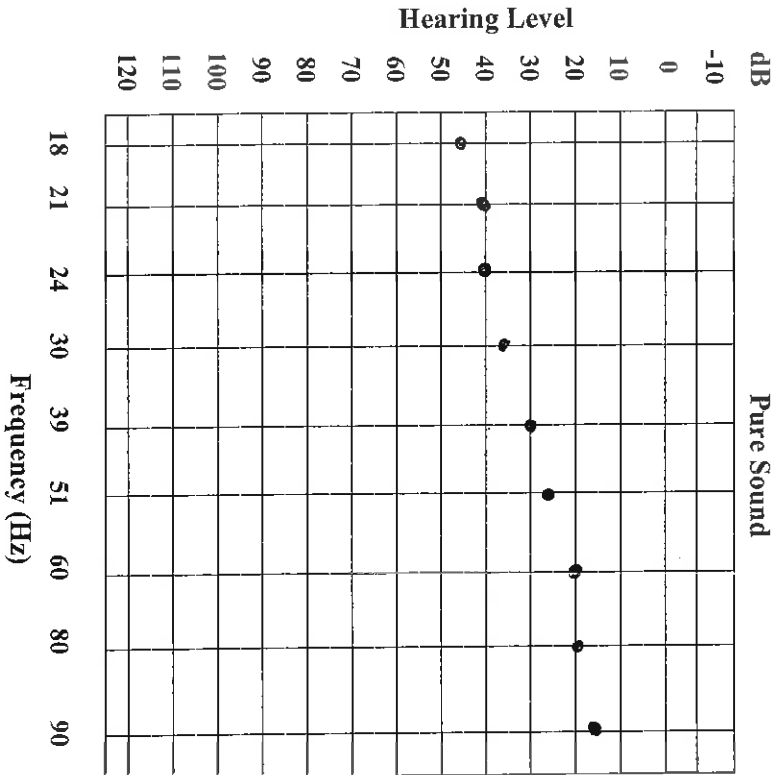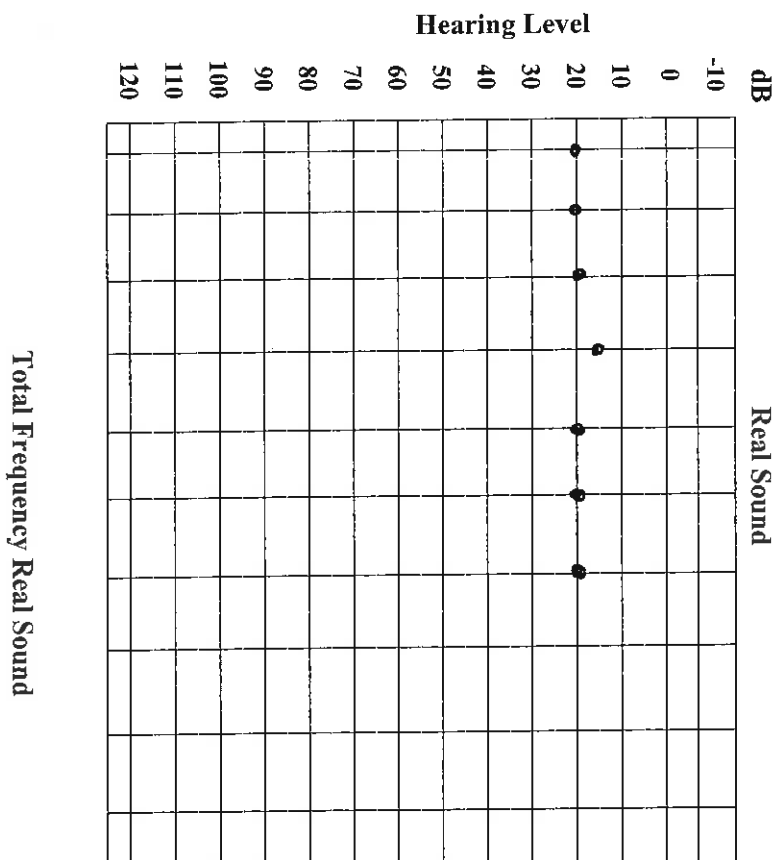

|  |
|--|
|  |
|  |
|  |
|  |
|  |
|  |

n.º: 5 Data: 14/03/17 Grupo:  Expostos  Não-expostos

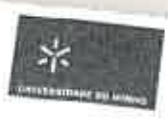

1. tipo de ruído escutou? (por exemplo: zumbido, faiscar).

zumbido

2. descreve o tipo de ruído que acabou de ouvir?

Rádido

3. escrever o tipo de incómodo que este ruído provoca? (por exemplo: fadiga, irritação, ...).

Obrigada pela sua participação!

# MINI EXAME DO ESTADO MENTAL

## 5 - LINGUAGEM (1 ponto por cada resposta correcta)

A. "Como se chama isto?" Mostrar os objectos:

Relógio

Lápis

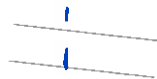

Nota: 2

B. "Repita a frase que vou dizer: O RATO ROEU A ROLHA"

Nota: 1

C. "Quando eu lhe der esta folha de papel, pegue nela com a mão direita, dobre-a ao meio e ponha sobre a mesa" (ou cama, se for o caso); dar a folha segurando com as duas mãos."

Pega com a mão direita

Dobra ao meio

Coloca onde deve

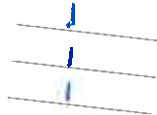

Nota: 3

D. "Leia o que está neste cartão e faça o que lá se diz". Mostrar um cartão com a frase bem legível "FECHE OS OLHOS"; sendo analfabeto, deve ler-se a frase.

Fechou os olhos

Nota: 1

E. "Escreva uma frase inteira aqui". Deve ter sujeito e verbo e fazer sentido; os erros gramaticais não prejudicam a pontuação.

Nota:

## 6 - HABILIDADE CONSTRUTIVA (1 ponto por cada cópia correcta.)

Deve copiar um desenho. Dois pentágonos parcialmente sobrepostos; cada um deles deve ficar com 5 lados, dois dos quais intersectados. Não valorizar tremor ou rotação.

DESENHO

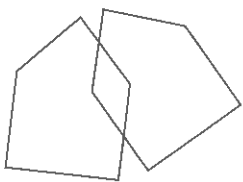

CÓPIA

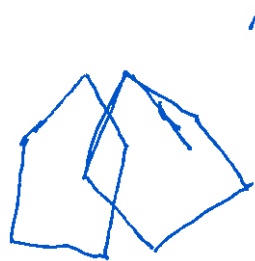

(Máximo 30 pontos)

TOTAL: 26

## Termo de Consentimento Informado

**Título do Projeto:** Os impactes da poluição sonora de baixa frequência na qualidade de vida e na sustentabilidade dos lugares: estudo do tipo expostos e não-expostos no município de Guimarães.

**Enquadramento:** Esta investigação enquadra-se no âmbito de uma tese de doutoramento desenvolvida no Departamento de Geografia da Universidade do Minho.

### Explicação da Pesquisa:

Esta pesquisa tem por objetivo investigar quais os impactes do ruído de baixa frequência na qualidade de vida e na sustentabilidade dos lugares. A fonte de emissão que se considera para este estudo são os postes e linhas de alta tensão presentes em áreas residenciais no município de Guimarães, Portugal. Para aferir estes impactes consideram-se dois grupos de exposição: os 'expostos' ou 'próximo da fonte' a freguesia de Serzedelo, e os 'não-expostos' ou 'distante da fonte' a freguesia de São Tomé de Abação. Consideram-se estas duas freguesias por possuírem características urbanas similares e distinguem-se por uma ter elevada concentração de linhas e postes de alta tensão em seu território e a outra estar livre da passagem destas infraestruturas. Os testes audiométricos permitirão compreender de forma pormenorizada os impactes deste tipo de exposição na qualidade de vida da população, bem com, complementar outros eixos determinantes da pesquisa, nomeadamente, a componente mais objetiva, os níveis sonoros medidos, e a componente mais subjetiva, os inquéritos com questões relativas aos hábitos alimentares, estilo de vida, ambientes, exposição ao ruído e etc.

Os ensaios audiométricos serão realizados no Laboratório de Ergonomia da Universidade do Minho.

**Confidencialidade e Anonimato:** Todos os dados obtidos nesta pesquisa serão utilizados, unicamente, para fins académicos e permanecerão confidenciais.

Esta pesquisa tem como responsáveis a Dr<sup>a</sup>. Paula Remoaldo, Dr<sup>a</sup>. Lúcia Torres Silva e o Dr. Pedro Arezes, professores da Universidade do Minho e Juliana Araújo Alves aluna de doutoramento da referida universidade.

Eu, abaixo assinado(a), concordo em participar desta pesquisa. Declaro que fui devidamente informado(a) e esclarecido(a) sobre as etapas deste estudo, sobre os procedimentos e técnicas utilizados durante os ensaios. Foi-me ainda resguardado(a) a confidencialidade e o anonimato. Declaro que autorizo o uso das informações obtidas nos ensaios para fins científicos.

Assinatura: \_\_\_\_\_

Data: 14 / 03 / 2017

## Avaliação da percepção da incomodidade devida ao ruído

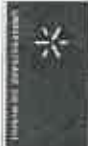

|                                                                                                                                           |                     |  |                            |                 |                                  |                 |                            |
|-------------------------------------------------------------------------------------------------------------------------------------------|---------------------|--|----------------------------|-----------------|----------------------------------|-----------------|----------------------------|
| Nome completo                                                                                                                             | ROSE AUGUSTO REUSTO |  | Idade:                     | 47 ANOS         |                                  |                 |                            |
| Profissão atual                                                                                                                           | NOTARIA             |  | Há quantos anos?           | 7 ANOS          |                                  |                 |                            |
| Profissão anterior                                                                                                                        | ENFERMEIRA AUTO     |  | Por quantos anos?          | 20 ANOS         |                                  |                 |                            |
| <b>Indique com (X) qual é o seu grau de concordância com cada uma das afirmações:</b>                                                     |                     |  | <b>Discordo totalmente</b> | <b>Discordo</b> | <b>Não concordo nem discordo</b> | <b>Concordo</b> | <b>Concordo Totalmente</b> |
| 1. Eu normalmente ouço bem.                                                                                                               |                     |  |                            |                 |                                  |                 | X                          |
| 2. Sinto-me incomodado(a) pelo ruído no meu dia-a-dia.                                                                                    |                     |  |                            |                 |                                  | X               |                            |
| 3. O ruído tem afetado a minha vida (por exemplo: o sono e a concentração).                                                               |                     |  | X                          |                 |                                  |                 |                            |
| 4. Desperto facilmente ao mínimo ruído.                                                                                                   |                     |  |                            | X               |                                  |                 |                            |
| 5. Habituo-me facilmente à maior parte dos ruídos.                                                                                        |                     |  |                            |                 | X                                |                 |                            |
| 6. Sinto-me irritado(a) com o ruído.                                                                                                      |                     |  |                            |                 |                                  | X               |                            |
| 7. Sinto-me incomodado(a) com o ruído proveniente do exterior da minha residência (por exemplo, da passagem dos veículos e dos vizinhos). |                     |  |                            | X               |                                  |                 |                            |
| 8. Sinto dificuldade em concentrar-me em ambientes ruidosos.                                                                              |                     |  |                            | X               |                                  |                 |                            |
| 9. Sinto dificuldade em relaxar em ambientes ruidosos.                                                                                    |                     |  |                            |                 |                                  | X               |                            |
| 10. Tenho consciência acerca dos impactos do ruído na minha saúde.                                                                        |                     |  |                            |                 |                                  |                 | X                          |

**Determinação do Limiar de Audição**  
 Ensaio n.º: 6      Data: 14/3/17      Grupo:  Expostos       Não-Expostos

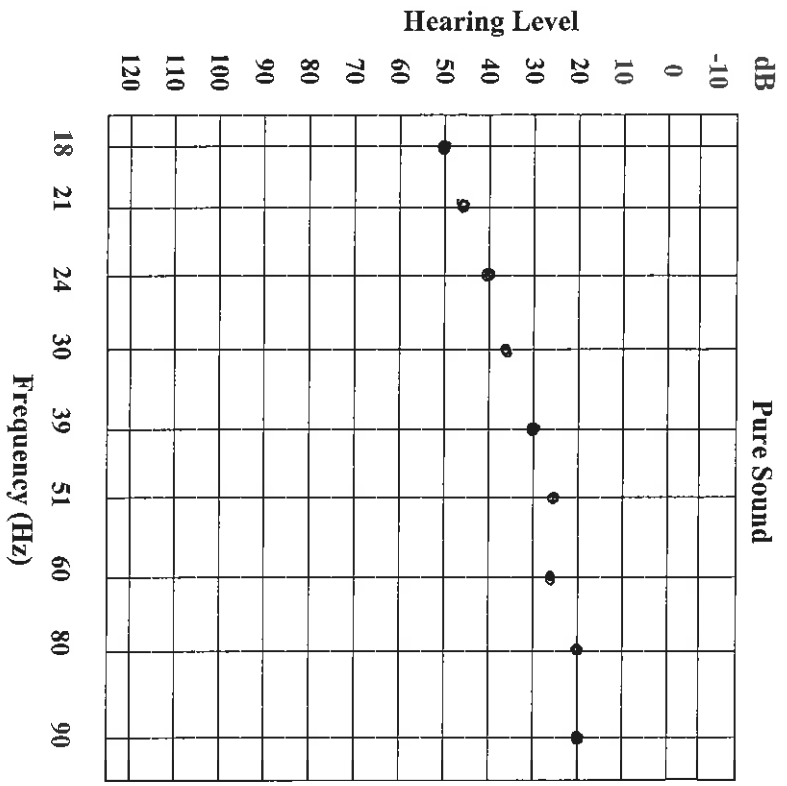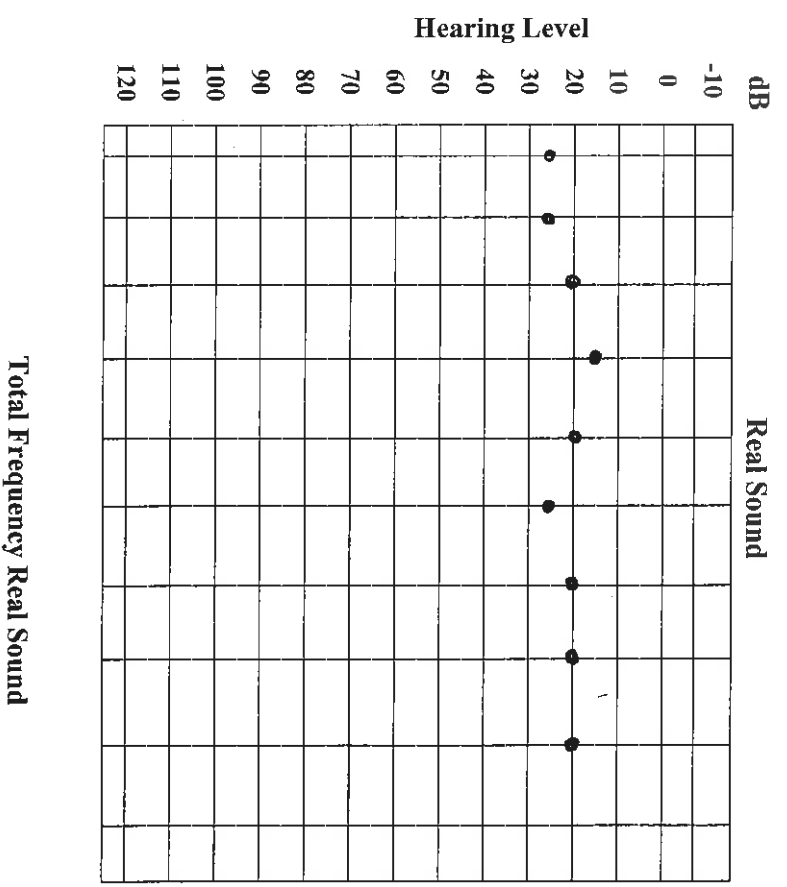

Total Frequency Real Sound

|  |
|--|
|  |
|  |
|  |
|  |
|  |
|  |
|  |
|  |
|  |
|  |
|  |

Ensaio n°.: 6 Data: 14/03/17 Grupo:  Expostos  Não-expostos

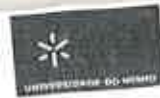

1. Que tipo de ruído escutou? (por exemplo: zumbido, faiscar).

Zumbido,

2. Como descreve o tipo de ruído que acabou de ouvir?

incómodo, alto e irritante

3. Pode descrever o tipo de incómodo que este ruído provoca? (por exemplo: fadiga, irritação, sonolência).

irritação

Obrigada pela sua participação!

ensaio nº: 6 Data: 14/03/17 Grupo:  Expostos  Não-expostos

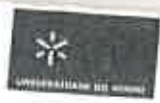

Que tipo de ruído escutou? (por exemplo: zumbido, faiscar).

zumbido,

Como descreve o tipo de ruído que acabou de ouvir?

como do tivo e irritante

Como descrever o tipo de incómodo que este ruído provoca? (por exemplo: fadiga, irritação, perda de audição).

irritação

Obrigada pela sua participação!



# MINI EXAME DO ESTADO MENTAL

NOME: JOSÉ AUGUSTO ALVITO

IDADE: 47 Anos

ESCOLARIDADE: 9º

Data: 14/03/2017

## 1 - ORIENTAÇÃO (1 ponto por cada resposta correcta)

- Em que ano estamos?
- Em que mês estamos?
- Em que dia do mês estamos?
- Em que dia da semana estamos?
- Em que estação do ano estamos?
- Em que país estamos?
- Em que distrito vive?
- Em que terra vive?
- Em que casa estamos?
- Em que andar estamos?

Nota: 9

## 2 - RETENÇÃO (contar 1 ponto por cada resposta correctamente repetida) "Vou dizer três palavras, queria que as repetisse mas só depois de eu as dizer todas; procure ficar a sabê-las de cor"

- Pêra
- Gato
- Bola

Nota: 3

## ATENÇÃO E CÁLCULO (contar 1 ponto por cada resposta correcta. Se der uma resposta errada mas depois continuar a subtrair bem, consideram-se as seguintes como correctas. Parar ao fim de 5 respostas.) "Agora peço-lhe que me diga quantos são 30 menos 3 e depois ao número encontrado voltar a tirar 3 e repete assim até eu dizer para parar".

- 27
- 24
- 21
- 18
- 15

Nota: 5

## VOCACÃO (1 ponto por cada resposta correcta.) Veja se consegue dizer as três palavras que pedi há pouco para decorar"

- êra
- ato
- la

Nota: 3

### Termo de Consentimento Informado

**Título do Projeto:** Os impactes da poluição sonora de baixa frequência na qualidade de vida e na sustentabilidade dos lugares: estudo do tipo expostos e não-expostos no município de Guimarães.

**Enquadramento:** Esta investigação enquadra-se no âmbito de uma tese de doutoramento desenvolvida no Departamento de Geografia da Universidade do Minho.

**Explicação da Pesquisa:**

Esta pesquisa tem por objetivo investigar quais os impactes do ruído de baixa frequência na qualidade de vida e na sustentabilidade dos lugares. A fonte de emissão que se considera para este estudo são os postes e linhas de alta tensão presentes em áreas residenciais no município de Guimarães, Portugal. Para aferir estes impactes consideram-se dois grupos de exposição: os 'expostos' ou 'próximo da fonte' a freguesia de Serzedelo, e os 'não-expostos' ou 'distante da fonte' a freguesia de São Tomé de Abação. Consideram-se estas duas freguesias por possuírem características urbanas similares e distinguem-se por uma ter elevada concentração de linhas e postes de alta tensão em seu território e a outra estar livre da passagem destas infraestruturas. Os testes audiométricos permitirão compreender de forma pormenorizada os impactes deste tipo de exposição na qualidade de vida da população, bem com, complementar outros eixos determinantes da pesquisa, nomeadamente, a componente mais objetiva, os níveis sonoros medidos, e a componente mais subjetiva, os inquéritos com questões relativas aos hábitos alimentares, estilo de vida, ambientes, exposição ao ruído e etc.

Os ensaios audiométricos serão realizados no Laboratório de Ergonomia da Universidade do Minho.

**Confidencialidade e Anonimato:** Todos os dados obtidos nesta pesquisa serão utilizados, unicamente, para fins académicos e permanecerão confidenciais.

Esta pesquisa tem como responsáveis a Dr<sup>a</sup>. Paula Remoaldo, Dr<sup>a</sup>. Lúgia Torres Silva e o Dr. Pedro Arezes, professores da Universidade do Minho e Juliana Araújo Alves aluna de doutoramento da referida universidade.

Eu, abaixo assinado(a), concordo em participar desta pesquisa. Declaro que fui devidamente informado(a) e esclarecido(a) sobre as etapas deste estudo, sobre os procedimentos e técnicas utilizados durante os ensaios. Foi-me ainda resguardado(a) a confidencialidade e o anonimato. Declaro que autorizo o uso das informações obtidas nos ensaios para fins científicos.

Assinatura: Luís Ambrósio Alves de Barros

Data: 16 / 11 / 2016

### Avaliação da percepção da incomodidade devida ao ruído

|                                                                                                                                           |                                |                 |                                  |                 |                            |  |  |  |
|-------------------------------------------------------------------------------------------------------------------------------------------|--------------------------------|-----------------|----------------------------------|-----------------|----------------------------|--|--|--|
| Nome completo                                                                                                                             | Luís André Tagalhães de Barros |                 | Idade:                           | 24              |                            |  |  |  |
| Profissão atual                                                                                                                           | Estudante                      |                 | Há quantos anos?                 | Desde sempre    |                            |  |  |  |
| Profissão anterior                                                                                                                        |                                |                 |                                  |                 |                            |  |  |  |
| <b>Indique com (X) qual é o seu grau de concordância com cada uma das afirmações:</b>                                                     | <b>Discordo totalmente</b>     | <b>Discordo</b> | <b>Não concordo nem discordo</b> | <b>Concordo</b> | <b>Concordo Totalmente</b> |  |  |  |
| 1. Eu normalmente ouço bem.                                                                                                               |                                |                 |                                  | X               |                            |  |  |  |
| 2. Sinto-me incomodado(a) pelo ruído no meu dia-a-dia.                                                                                    |                                |                 | X                                |                 |                            |  |  |  |
| 3. O ruído tem afetado a minha vida (por exemplo: o sono e a concentração).                                                               |                                | X               |                                  |                 |                            |  |  |  |
| 4. Desperto facilmente ao mínimo ruído.                                                                                                   |                                | X               |                                  |                 |                            |  |  |  |
| 5. Habituo-me facilmente à maior parte dos ruídos.                                                                                        |                                |                 | X                                |                 |                            |  |  |  |
| 6. Sinto-me irritado(a) com o ruído.                                                                                                      |                                |                 | X                                |                 |                            |  |  |  |
| 7. Sinto-me incomodado(a) com o ruído proveniente do exterior da minha residência (por exemplo, da passagem dos veículos e dos vizinhos). | X                              |                 |                                  |                 |                            |  |  |  |
| 8. Sinto dificuldade em concentrar-me em ambientes ruidosos.                                                                              |                                |                 |                                  |                 | X                          |  |  |  |
| 9. Sinto dificuldade em relaxar em ambientes ruidosos.                                                                                    |                                |                 |                                  |                 | X                          |  |  |  |
| 10. Tenho consciência acerca dos impactes do ruído na minha saúde.                                                                        |                                |                 |                                  |                 | X                          |  |  |  |

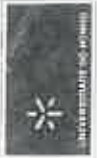

Determinação do Limiar de Audição

Ensaio n.º: 01 Data: 16/11/2016

Grupo:  Expostos  Não-Expostos

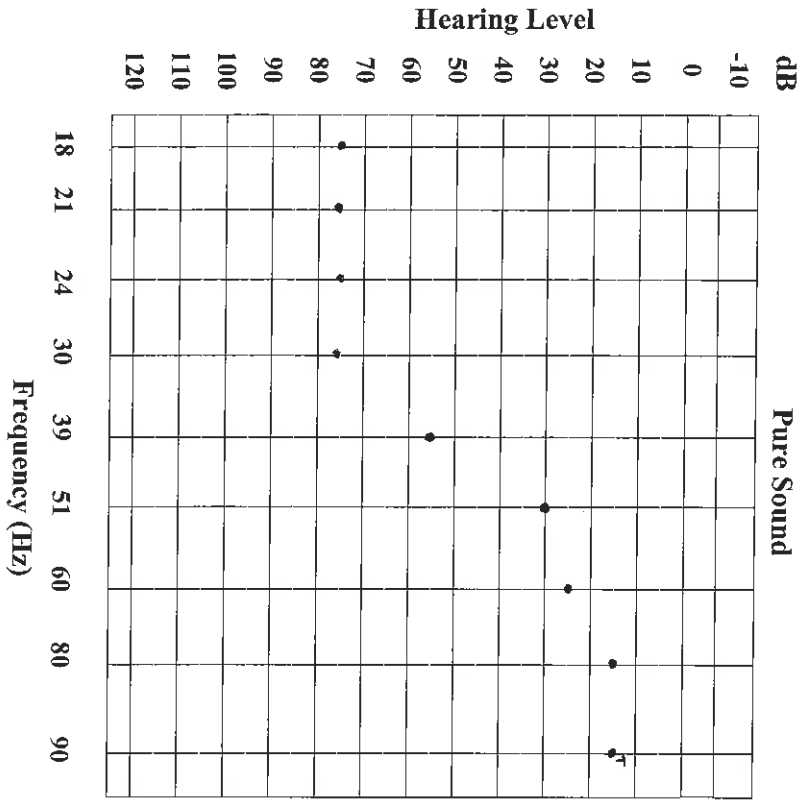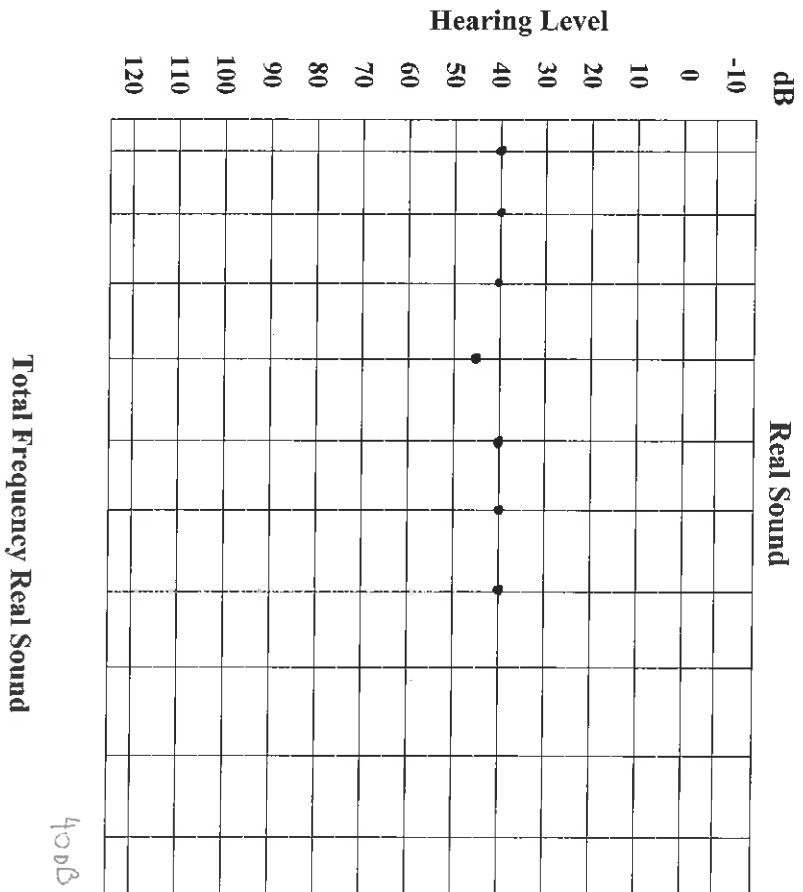

Total Frequency Real Sound

40dB

O participante recebeu 90ms de ultrassom de 18Hz para avaliar a dificuldade de audição de frequência de 18Hz a 90Hz e o ruído de fundo.

Ensaio n.º: 01 Data: 16/11/2016 Grupo:  Expostos  Não-expostos

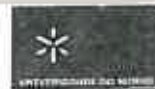

1. Que tipo de ruído escutou? (por exemplo: zumbido, faiscar).

Zumbido

2. Como descreve o tipo de ruído que acabou de ouvir?

Zumbido constante (nem mais grave outro mais agudo)

3. Pode descrever o tipo de incómodo que este ruído provoca? (por exemplo: fadiga, irritação, sonolência).

Alguns irritação

Obrigada pela sua participação!

## MINI EXAME DO ESTADO MENTAL

NOME: Luis A. de Itagalhães de Barros  
IDADE: 24 Anos ESCOLARIDADE: Letrado Data: 16-11-2016

### 1 - ORIENTAÇÃO (1 ponto por cada resposta correcta)

|                                |                      |
|--------------------------------|----------------------|
| Em que ano estamos?            | <u>2016</u> <u>1</u> |
| Em que mês estamos?            | <u>1</u>             |
| Em que dia do mês estamos?     | <u>1</u>             |
| Em que dia da semana estamos?  | <u>1</u>             |
| Em que estação do ano estamos? | <u>1</u>             |
| Em que país estamos?           | <u>1</u>             |
| Em que distrito vive?          | <u>1</u>             |
| Em que terra vive?             | <u>1</u>             |
| Em que casa estamos?           | <u>1</u>             |
| Em que andar estamos?          | <u>0</u>             |

Nota: 9

### 2 - RETENÇÃO (contar 1 ponto por cada resposta correctamente repetida)

"Vou dizer três palavras, queria que as repetisse mas só depois de eu as dizer todas; procure ficar a sabê-las de cor"

|      |          |
|------|----------|
| Pêra | <u>1</u> |
| Gato | <u>1</u> |
| Bola | <u>1</u> |

Nota: 3

### 3 - ATENÇÃO E CÁLCULO (contar 1 ponto por cada resposta correcta. Se der uma resposta errada mas depois continuar a subtrair bem, consideram-se as seguintes como correctas. Parar ao fim de 5 respostas.)

"Agora peça-lhe que me diga quantos são 30 menos 3 e depois ao número encontrado voltar a tirar 3 e repete assim até eu dizer para parar".

27 1 24 1 21 1 18 1 15 1

Nota: 5

### 4 - EVOCAÇÃO (1 ponto por cada resposta correcta.)

"Veja se consegue dizer as três palavras que pedi há pouco para decorar".

|      |          |
|------|----------|
| Pêra | <u>1</u> |
| Gato | <u>1</u> |
| Bola | <u>1</u> |

Nota: 3

## Termo de Consentimento Informado

**Título do Projeto:** Os impactes da poluição sonora de baixa frequência na qualidade de vida e na sustentabilidade dos lugares: estudo do tipo expostos e não-expostos no município de Guimarães.

**Enquadramento:** Esta investigação enquadra-se no âmbito de uma tese de doutoramento desenvolvida no Departamento de Geografia da Universidade do Minho.

**Explicação da Pesquisa:**

Esta pesquisa tem por objetivo investigar quais os impactes do ruído de baixa frequência na qualidade de vida e na sustentabilidade dos lugares. A fonte de emissão que se considera para este estudo são os postes e linhas de alta tensão presentes em áreas residenciais no município de Guimarães, Portugal. Para aferir estes impactes consideram-se dois grupos de exposição: os 'expostos' ou 'próximo da fonte' a freguesia de Serzedelo, e os 'não-expostos' ou 'distante da fonte' a freguesia de São Tomé de Abação. Consideram-se estas duas freguesias por possuírem características urbanas similares e distinguem-se por uma ter elevada concentração de linhas e postes de alta tensão em seu território e a outra estar livre da passagem destas infraestruturas. Os testes audiométricos permitirão compreender de forma pormenorizada os impactes deste tipo de exposição na qualidade de vida da população, bem com, complementar outros eixos determinantes da pesquisa, nomeadamente, a componente mais objetiva, os níveis sonoros medidos, e a componente mais subjetiva, os inquéritos com questões relativas aos hábitos alimentares, estilo de vida, ambientes, exposição ao ruído e etc.

Os ensaios audiométricos serão realizados no Laboratório de Ergonomia da Universidade do Minho.

**Confidencialidade e Anonimato:** Todos os dados obtidos nesta pesquisa serão utilizados, unicamente, para fins académicos e permanecerão confidenciais.

Esta pesquisa tem como responsáveis a Dr<sup>a</sup>. Paula Remoaldo, Dr<sup>a</sup>. Lígia Torres Silva e o Dr. Pedro Arezes, professores da Universidade do Minho e Juliana Araújo Alves aluna de doutoramento da referida universidade.

Eu, abaixo assinado(a), concordo em participar desta pesquisa. Declaro que fui devidamente informado(a) e esclarecido(a) sobre as etapas deste estudo, sobre os procedimentos e técnicas utilizados durante os ensaios. Foi-me ainda resguardado(a) a confidencialidade e o anonimato. Declaro que autorizo o uso das informações obtidas nos ensaios para fins científicos.

Assinatura: Paula Remoaldo

Data: 16/11/2016

**Avaliação da percepção da incomodidade devida ao ruído**

| Nome completo                                                                                                                             | Jose Carlos Ferreira Machado |          | Idade:                    | 56       |                     |  |
|-------------------------------------------------------------------------------------------------------------------------------------------|------------------------------|----------|---------------------------|----------|---------------------|--|
| Profissão atual                                                                                                                           | DESCOMPACTADO                |          | Há quantos anos?          | 6 ANOS   |                     |  |
| Profissão anterior                                                                                                                        | OP. TEXTIL                   |          | Por quantos anos?         | 45 ANOS  |                     |  |
| Indique com (X) qual é o seu grau de concordância com cada uma das afirmações:                                                            | Discordo totalmente          | Discordo | Não concordo nem discordo | Concordo | Concordo Totalmente |  |
| 1. Eu normalmente ouço bem.                                                                                                               |                              | X        |                           |          |                     |  |
| 2. Sinto-me incomodado(a) pelo ruído no meu dia-a-dia.                                                                                    |                              | X        |                           |          |                     |  |
| 3. O ruído tem afetado a minha vida (por exemplo: o sono e a concentração).                                                               |                              | X        |                           |          |                     |  |
| 4. Desperto facilmente ao mínimo ruído.                                                                                                   |                              |          |                           | X        |                     |  |
| 5. Habituo-me facilmente à maior parte dos ruídos.                                                                                        |                              |          | X                         |          |                     |  |
| 6. Sinto-me irritado(a) com o ruído.                                                                                                      |                              |          |                           |          | X                   |  |
| 7. Sinto-me incomodado(a) com o ruído proveniente do exterior da minha residência (por exemplo, da passagem dos veículos e dos vizinhos). |                              | X        |                           |          |                     |  |
| 8. Sinto dificuldade em concentrar-me em ambientes ruidosos.                                                                              |                              |          | X                         |          |                     |  |
| 9. Sinto dificuldade em relaxar em ambientes ruidosos.                                                                                    |                              |          |                           | X        |                     |  |
| 10. Tenho consciência acerca dos impactes do ruído na minha saúde.                                                                        |                              |          |                           |          | X                   |  |



Determinação do Limiar de Audição

Ensaio n°.: 02

Data: 16/11/15

Grupo:  Expostos

Não-Expostos

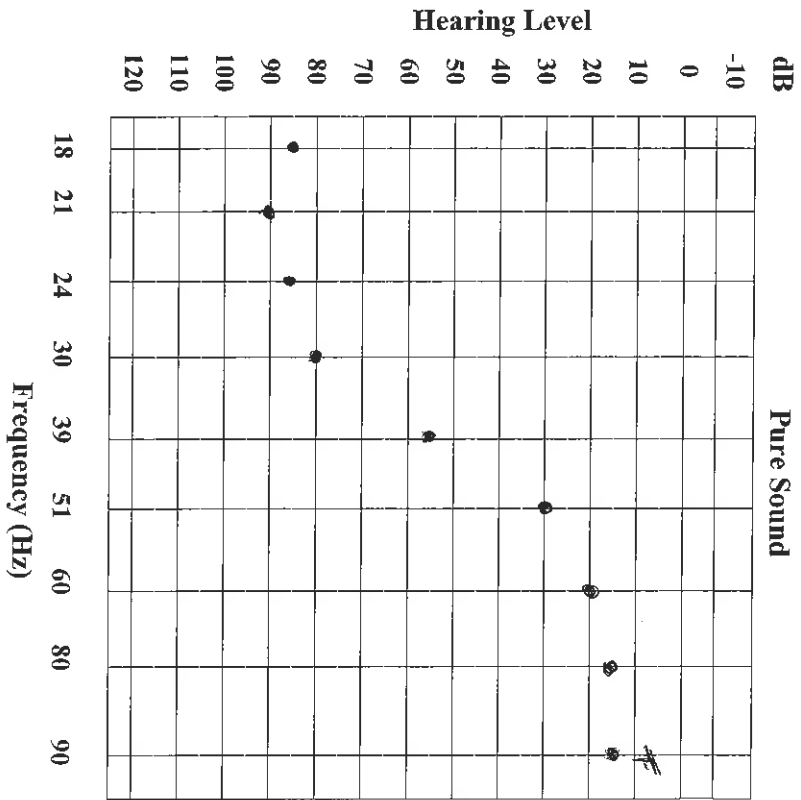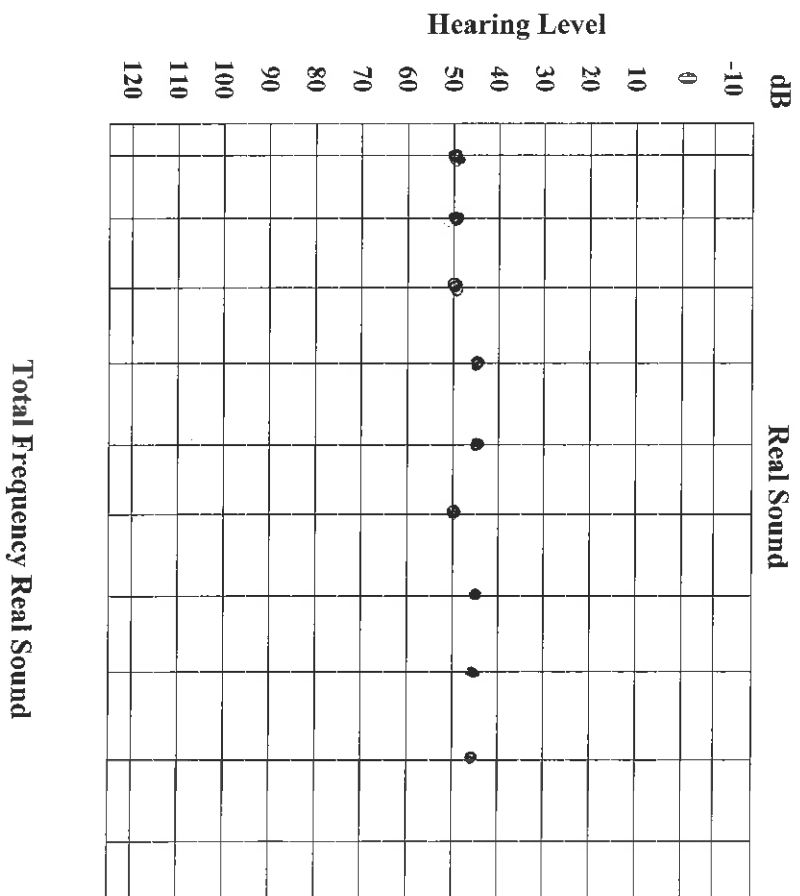

|  |
|--|
|  |
|  |
|  |
|  |
|  |
|  |
|  |
|  |

Ensaio nº.: 02 Data: \_\_\_\_\_ Grupo:  Expostos  Não-expostos

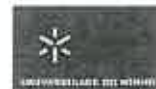

1. Que tipo de ruído escutou? (por exemplo: zumbido, faiscar).

Zumbido GRAVE

2. Como descreve o tipo de ruído que acabou de ouvir?

ruído contínuo LOPGA

3. Pode descrever o tipo de incómodo que este ruído provoca? (por exemplo: fadiga, irritação, sonolência).

SONOLÊNCIA

Obrigada pela sua participação!

## MINI EXAME DO ESTADO MENTAL

NOME: JOSÉ CARLOS BARROS WICKARD  
IDADE: 56 Anos ESCOLARIDADE: 9ª CLASSE Data: 16/11/2016

### 1 - ORIENTAÇÃO (1 ponto por cada resposta correcta)

Em que ano estamos? ↓  
Em que mês estamos? ↓  
Em que dia do mês estamos? ↓  
Em que dia da semana estamos? ↓  
Em que estação do ano estamos? ↓  
Em que país estamos? ↓  
Em que distrito vive? ↓  
Em que terra vive? ↓  
Em que casa estamos? ↓  
Em que andar estamos? ↓

Nota: 10

### 2 - RETENÇÃO (contar 1 ponto por cada resposta correctamente repetida)

"Vou dizer três palavras, queria que as repetisse mas só depois de eu as dizer todas; procure ficar a sabê-las de cor"

Pêra ↓  
Gato ↓  
Bola ↓

Nota: 3

### 3 - ATENÇÃO E CÁLCULO (contar 1 ponto por cada resposta correcta. Se der uma resposta errada mas depois continuar a subtrair bem, consideram-se as seguintes como correctas. Parar ao fim de 5 respostas.)

"Agora peço-lhe que me diga quantos são 30 menos 3 e depois ao número encontrado voltar a tirar 3 e repete assim até eu dizer para parar".

27 ↓ 24 ↓ 21 ↓ 18 ↓ 15 ↓

Nota: 5

### 4 - EVOCAÇÃO (1 ponto por cada resposta correcta.)

"Veja se consegue dizer as três palavras que pedi há pouco para decorar"

Pêra ↓  
Gato ↓  
Bola ↓

Nota: 2

## Termo de Consentimento Informado

**Título do Projeto:** Os impactes da poluição sonora de baixa frequência na qualidade de vida e na sustentabilidade dos lugares: estudo do tipo expostos e não-expostos no município de Guimarães.

**Enquadramento:** Esta investigação enquadra-se no âmbito de uma tese de doutoramento desenvolvida no Departamento de Geografia da Universidade do Minho.

### Explicação da Pesquisa:

Esta pesquisa tem por objetivo investigar quais os impactes do ruído de baixa frequência na qualidade de vida e na sustentabilidade dos lugares. A fonte de emissão que se considera para este estudo são os postes e linhas de alta tensão presentes em áreas residenciais no município de Guimarães, Portugal. Para aferir estes impactes consideram-se dois grupos de exposição: os 'expostos' ou 'próximo da fonte' a freguesia de Serzedelo, e os 'não-expostos' ou 'distante da fonte' a freguesia de São Tomé de Abação. Consideram-se estas duas freguesias por possuírem características urbanas similares e distinguem-se por uma ter elevada concentração de linhas e postes de alta tensão em seu território e a outra estar livre da passagem destas infraestruturas. Os testes audiométricos permitirão compreender de forma pormenorizada os impactes deste tipo de exposição na qualidade de vida da população, bem com, complementar outros eixos determinantes da pesquisa, nomeadamente, a componente mais objetiva, os níveis sonoros medidos, e a componente mais subjetiva, os inquéritos com questões relativas aos hábitos alimentares, estilo de vida, ambientes, exposição ao ruído e etc.

Os ensaios audiométricos serão realizados no Laboratório de Ergonomia da Universidade do Minho.

**Confidencialidade e Anonimato:** Todos os dados obtidos nesta pesquisa serão utilizados, unicamente, para fins académicos e permanecerão confidenciais.

Esta pesquisa tem como responsáveis a Dr<sup>a</sup>. Paula Remoaldo, Dr<sup>a</sup>. Lúcia Torres Silva e o Dr. Pedro Arezes, professores da Universidade do Minho e Juliana Araújo Alves aluna de doutoramento da referida universidade.

Eu, abaixo assinado(a), concordo em participar desta pesquisa. Declaro que fui devidamente informado(a) e esclarecido(a) sobre as etapas deste estudo, sobre os procedimentos e técnicas utilizados durante os ensaios. Foi-me ainda resguardado(a) a confidencialidade e o anonimato. Declaro que autorizo o uso das informações obtidas nos ensaios para fins científicos.

Assinatura:

Data: \_\_\_\_\_

*Domingo Pinheiro de Almeida*

**Avaliação da percepção da incomodidade devida ao ruído**

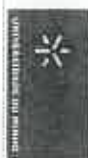

|                                                                                                                                           |                                  |                   |                |                            |                                     |                                  |                                     |                            |
|-------------------------------------------------------------------------------------------------------------------------------------------|----------------------------------|-------------------|----------------|----------------------------|-------------------------------------|----------------------------------|-------------------------------------|----------------------------|
| Nome completo                                                                                                                             | <i>BRUNOES RUIZÉIA DE ARAÚJO</i> | Idade:            | <i>58</i>      |                            |                                     |                                  |                                     |                            |
| Profissão atual                                                                                                                           | <i>RECURSADA</i>                 | Há quantos anos?  | <i>42 ANOS</i> |                            |                                     |                                  |                                     |                            |
| Profissão anterior                                                                                                                        | <i>—</i>                         | Por quantos anos? | <i>—</i>       |                            |                                     |                                  |                                     |                            |
| <b>Indique com (X) qual é o seu grau de concordância com cada uma das afirmações:</b>                                                     |                                  |                   |                | <b>Discordo totalmente</b> | <b>Discordo</b>                     | <b>Não concordo nem discordo</b> | <b>Concordo</b>                     | <b>Concordo Totalmente</b> |
| 1. Eu normalmente ouço bem.                                                                                                               |                                  |                   |                |                            | <input checked="" type="checkbox"/> |                                  |                                     |                            |
| 2. Sinto-me incomodado(a) pelo ruído no meu dia-a-dia.                                                                                    |                                  |                   |                |                            |                                     |                                  | <input checked="" type="checkbox"/> |                            |
| 3. O ruído tem afetado a minha vida (por exemplo: o sono e a concentração).                                                               |                                  |                   |                |                            |                                     |                                  | <input checked="" type="checkbox"/> |                            |
| 4. Desperto facilmente ao mínimo ruído.                                                                                                   |                                  |                   |                |                            | <input checked="" type="checkbox"/> |                                  |                                     |                            |
| 5. Habituo-me facilmente à maior parte dos ruídos.                                                                                        |                                  |                   |                |                            |                                     |                                  | <input checked="" type="checkbox"/> |                            |
| 6. Sinto-me irritado(a) com o ruído.                                                                                                      |                                  |                   |                |                            | <input checked="" type="checkbox"/> |                                  |                                     |                            |
| 7. Sinto-me incomodado(a) com o ruído proveniente do exterior da minha residência (por exemplo, da passagem dos veículos e dos vizinhos). |                                  |                   |                |                            |                                     |                                  | <input checked="" type="checkbox"/> |                            |
| 8. Sinto dificuldade em concentrar-me em ambientes ruidosos.                                                                              |                                  |                   |                |                            |                                     |                                  | <input checked="" type="checkbox"/> |                            |
| 9. Sinto dificuldade em relaxar em ambientes ruidosos.                                                                                    |                                  |                   |                |                            | <input checked="" type="checkbox"/> |                                  |                                     |                            |
| 10. Tenho consciência acerca dos impactes do ruído na minha saúde.                                                                        |                                  |                   |                |                            | <input checked="" type="checkbox"/> |                                  |                                     |                            |

Determinação do Limiar de Audição

Ensaio n°: 03

Data: \_\_\_\_\_

Grupo:  Expostos

Não-Expostos

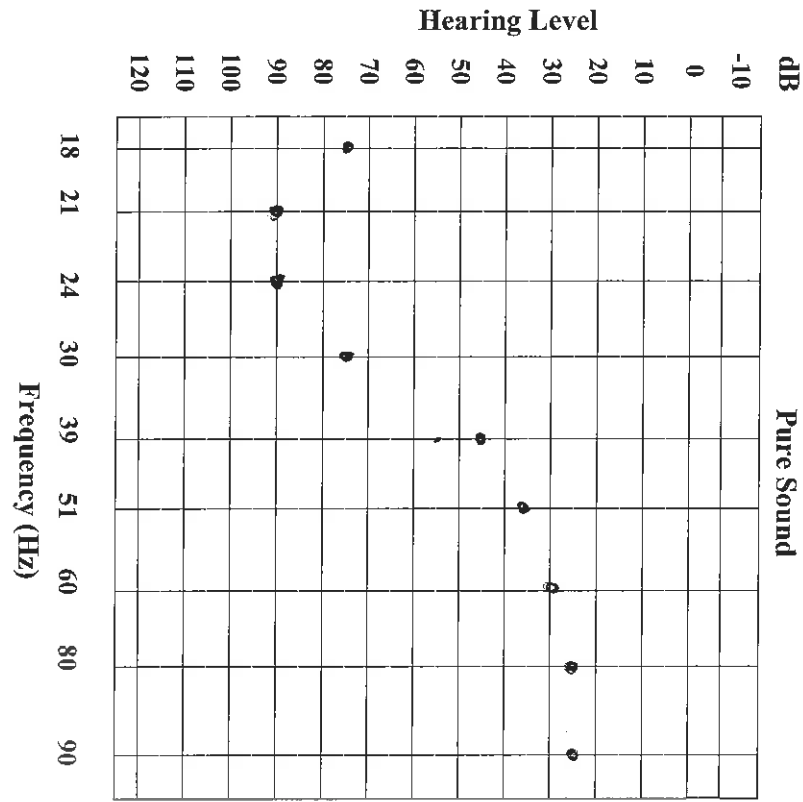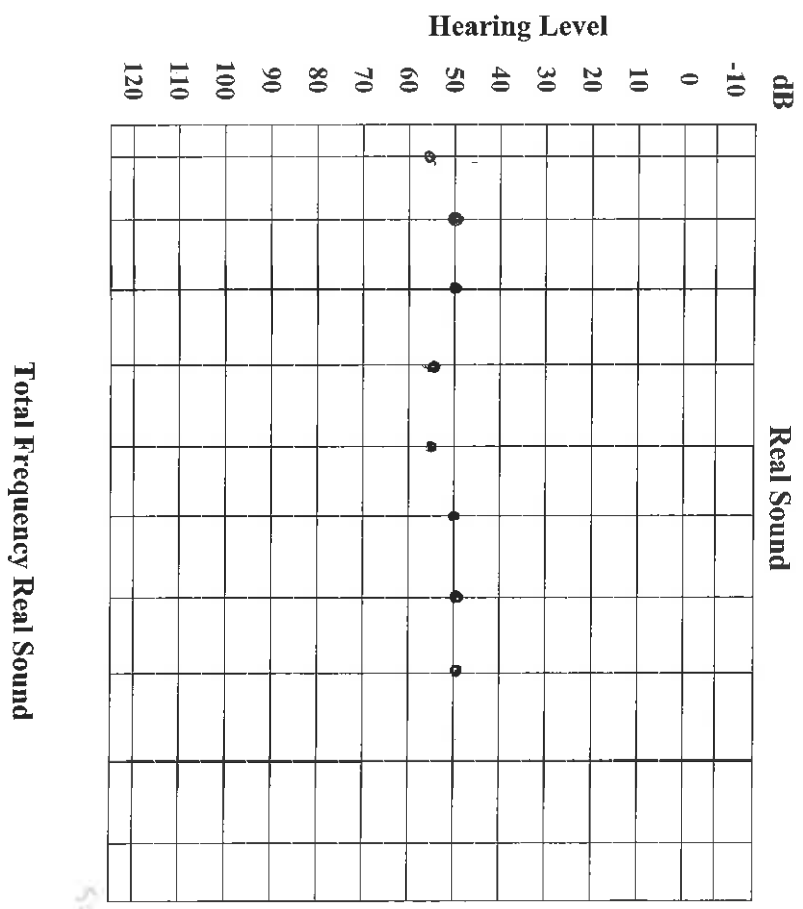

Total Frequency Real Sound

|  |
|--|
|  |
|  |
|  |
|  |
|  |
|  |
|  |
|  |

50dB

Ensaio nº.: 03 Data: 16/11/2016 Grupo:  Expostos  Não-expostos

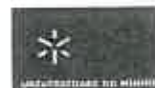

1. Que tipo de ruído escutou? (por exemplo: zumbido, faiscar).

---

---

2. Como descreve o tipo de ruído que acabou de ouvir?

WHOM WHOM WHOM

---

---

3. Pode descrever o tipo de incómodo que este ruído provoca? (por exemplo: fadiga, irritação, sonolência).

DO DE CABEÇA

---

---

Obrigada pela sua participação!

# MINI EXAME DO ESTADO MENTAL

2023-01-10

NOME: Bruno Antão  
IDADE: 58 Anos ESCOLARIDADE: 4º curso Data: 16/11/2016

## 1 - ORIENTAÇÃO (1 ponto por cada resposta correcta)

- Em que ano estamos? ↓
- Em que mês estamos? ↓
- Em que dia do mês estamos? ↓
- Em que dia da semana estamos? ↓
- Em que estação do ano estamos? ↓
- Em que país estamos? ↓
- Em que distrito vive? ↓
- Em que terra vive? ↓
- Em que casa estamos? ↓
- Em que andar estamos? ↓

Nota: 10

## 2 - RETENÇÃO (contar 1 ponto por cada resposta correctamente repetida)

"Vou dizer três palavras, queria que as repetisse mas só depois de eu as dizer todas; procure ficar a sabê-las de cor"

- Pêra ↓
- Gato ↓
- Bola ↓

Nota: 3

## 3 - ATENÇÃO E CÁLCULO (contar 1 ponto por cada resposta correcta. Se der uma resposta errada mas depois continuar a subtrair bem, consideram-se as seguintes como correctas. Parar ao fim de 5 respostas.)

"Agora peço-lhe que me diga quantos são 30 menos 3 e depois ao número encontrado voltar a tirar 3 e repete assim até eu dizer para parar".

- 27 ↓ 24 ↓ 21 ↓ 18 ↓ 15 ↓

Nota: 5

## 4 - EVOCAÇÃO (1 ponto por cada resposta correcta.)

"Veja se consegue dizer as três palavras que pedi há pouco para decorar".

- Pêra ↓
- Gato 0
- Bola 0

Nota: ↓



## Termo de Consentimento Informado

**Título do Projeto:** Os impactes da poluição sonora de baixa frequência na qualidade de vida e na sustentabilidade dos lugares: estudo do tipo expostos e não-expostos no município de Guimarães.

**Enquadramento:** Esta investigação enquadra-se no âmbito de uma tese de doutoramento desenvolvida no Departamento de Geografia da Universidade do Minho.

### Explicação da Pesquisa:

Esta pesquisa tem por objetivo investigar quais os impactes do ruído de baixa frequência na qualidade de vida e na sustentabilidade dos lugares. A fonte de emissão que se considera para este estudo são os postes e linhas de alta tensão presentes em áreas residenciais no município de Guimarães, Portugal. Para aferir estes impactes consideram-se dois grupos de exposição: os 'expostos' ou 'próximo da fonte' a freguesia de Serzedelo, e os 'não-expostos' ou 'distante da fonte' a freguesia de São Tomé de Abação. Consideram-se estas duas freguesias por possuírem características urbanas similares e distinguem-se por uma ter elevada concentração de linhas e postes de alta tensão em seu território e a outra estar livre da passagem destas infraestruturas. Os testes audiométricos permitirão compreender de forma pormenorizada os impactes deste tipo de exposição na qualidade de vida da população, bem com, complementar outros eixos determinantes da pesquisa, nomeadamente, a componente mais objetiva, os níveis sonoros medidos, e a componente mais subjetiva, os inquéritos com questões relativas aos hábitos alimentares, estilo de vida, ambientes, exposição ao ruído e etc.

Os ensaios audiométricos serão realizados no Laboratório de Ergonomia da Universidade do Minho.

**Confidencialidade e Anonimato:** Todos os dados obtidos nesta pesquisa serão utilizados, unicamente, para fins académicos e permanecerão confidenciais.

Esta pesquisa tem como responsáveis a Dr<sup>a</sup>. Paula Remoaldo, Dr<sup>a</sup>. Lúgia Torres Silva e o Dr. Pedro Arezes, professores da Universidade do Minho e Juliana Araújo Alves aluna de doutoramento da referida universidade.

Eu, abaixo assinado(a), concordo em participar desta pesquisa. Declaro que fui devidamente informado(a) e esclarecido(a) sobre as etapas deste estudo, sobre os procedimentos e técnicas utilizados durante os ensaios. Foi-me ainda resguardado(a) a confidencialidade e o anonimato. Declaro que autorizo o uso das informações obtidas nos ensaios para fins científicos.

Assinatura:

Fernando Ferreira Gonçalves

Data: 16/11/2016

**avaliação da percepção da incomodidade devida ao ruído**

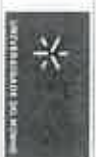

|                                                                                                                                           |                             |          |                           |          |                     |
|-------------------------------------------------------------------------------------------------------------------------------------------|-----------------------------|----------|---------------------------|----------|---------------------|
| Nome completo                                                                                                                             | fernando ferreira Gonçalves |          | Idade:                    | 62       |                     |
| Profissão atual                                                                                                                           | desempregado                |          | Há quantos anos?          | 6 mes    |                     |
| Profissão anterior                                                                                                                        | chefe de armazem            |          | Por quantos anos?         | 16 anos  |                     |
| <b>Indique com (X) qual é o seu grau de concordância com cada uma das afirmações:</b>                                                     |                             |          |                           |          |                     |
| 1. Eu normalmente ouço bem.                                                                                                               | Discordo totalmente         | Discordo | Não concordo nem discordo | Concordo | Concordo Totalmente |
| 2. Sinto-me incomodado(a) pelo ruído no meu dia-a-dia.                                                                                    |                             | X        |                           | X        |                     |
| 3. O ruído tem afetado a minha vida (por exemplo: o sono e a concentração).                                                               |                             | X        |                           | X        |                     |
| 4. Desperto facilmente ao mínimo ruído.                                                                                                   |                             | X        |                           | X        |                     |
| 5. Habituo-me facilmente à maior parte dos ruídos.                                                                                        |                             |          |                           | X        |                     |
| 6. Sinto-me irritado(a) com o ruído.                                                                                                      |                             |          |                           | X        |                     |
| 7. Sinto-me incomodado(a) com o ruído proveniente do exterior da minha residência (por exemplo, da passagem dos veículos e dos vizinhos). |                             |          |                           | X        |                     |
| 8. Sinto dificuldade em concentrar-me em ambientes ruidosos.                                                                              |                             |          |                           | X        |                     |
| 9. Sinto dificuldade em relaxar em ambientes ruidosos.                                                                                    |                             |          |                           | X        |                     |
| 10. Tenho consciência acerca dos impactes do ruído na minha saúde.                                                                        |                             |          |                           | X        |                     |

Determinação do Limiar de Audição  
Ensaio n°.: 04

Data: 16/11/16

Grupo:  Expostos  Não-Expostos

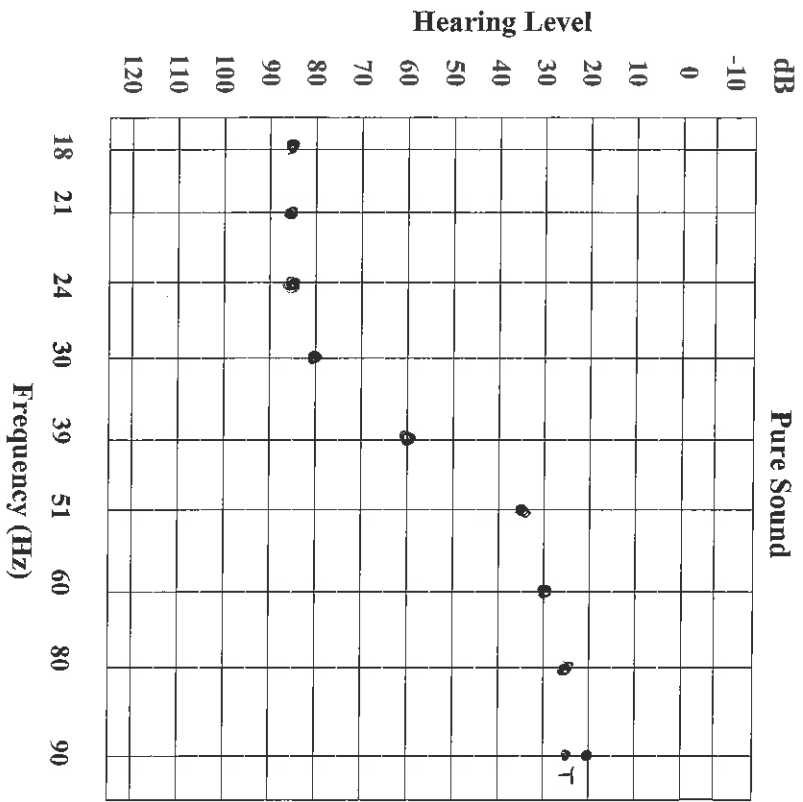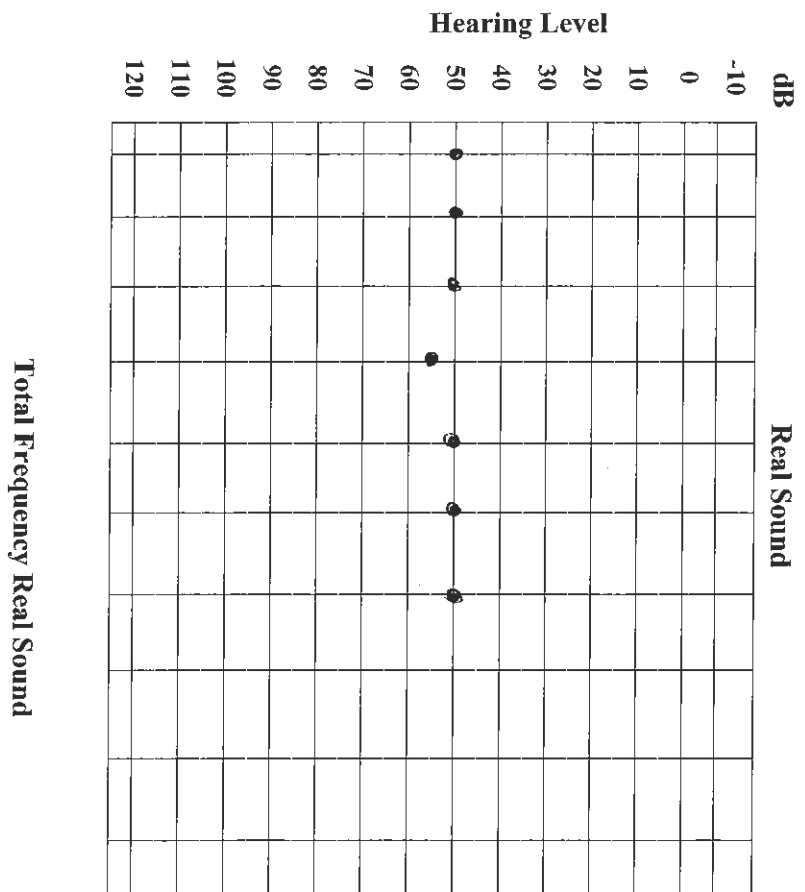

Total Frequency Real Sound

|  |
|--|
|  |
|  |
|  |
|  |

Ensaio nº.: 04 Data: 16/11/2016 Grupo:  Expostos  Não-expostos

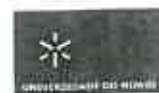

1. Que tipo de ruído escutou? (por exemplo: zumbido, faiscar).

ZUMBIDO

2. Como descreve o tipo de ruído que acabou de ouvir?

ZUMBIDO

3. Pode descrever o tipo de incómodo que este ruído provoca? (por exemplo: fadiga, irritação, sonolência).

SONOLÊNCIA

Obrigada pela sua participação!

## MINI EXAME DO ESTADO MENTAL

NOME: FERNANDO FERREIRA GONÇALVES  
IDADE: 62 Anos ESCOLARIDADE: 4ª CLASSE Data: 16/11/2016

### 1 - ORIENTAÇÃO (1 ponto por cada resposta correcta)

Em que ano estamos? 1  
Em que mês estamos? 1  
Em que dia do mês estamos? 1  
Em que dia da semana estamos? 1  
Em que estação do ano estamos? 0  
Em que país estamos? 1  
Em que distrito vive? 1  
Em que terra vive? 1  
Em que casa estamos? 1  
Em que andar estamos? 0

Nota: 8

### 2 - RETENÇÃO (contar 1 ponto por cada resposta correctamente repetida)

"Vou dizer três palavras, queria que as repetisse mas só depois de eu as dizer todas; procure ficar a sabê-las de cor"

Pêra 1  
Gato 1  
Bola 1

Nota: 3

### 3 - ATENÇÃO E CÁLCULO (contar 1 ponto por cada resposta correcta. Se der uma resposta errada mas depois continuar a subtrair bem, consideram-se as seguintes como correctas. Parar ao fim de 5 respostas.)

"Agora peço-lhe que me diga quantos são 30 menos 3 e depois ao número encontrado voltar a tirar 3 e repete assim até eu dizer para parar".

27 1 24 1 21 1 18 1 15 1

Nota: 5

### 4 - EVOCAÇÃO (1 ponto por cada resposta correcta.)

"Veja se consegue dizer as três palavras que pedi há pouco para decorar".

Pêra 1  
Gato 1  
Bola 1

Nota: 3

## Termo de Consentimento Informado

**Título do Projeto:** Os impactes da poluição sonora de baixa frequência na qualidade de vida e na sustentabilidade dos lugares: estudo do tipo expostos e não-expostos no município de Guimarães.

**Enquadramento:** Esta investigação enquadra-se no âmbito de uma tese de doutoramento desenvolvida no Departamento de Geografia da Universidade do Minho.

### Explicação da Pesquisa:

Esta pesquisa tem por objetivo investigar quais os impactes do ruído de baixa frequência na qualidade de vida e na sustentabilidade dos lugares. A fonte de emissão que se considera para este estudo são os postes e linhas de alta tensão presentes em áreas residenciais no município de Guimarães, Portugal. Para aferir estes impactes consideram-se dois grupos de exposição: os 'expostos' ou 'próximo da fonte' a freguesia de Serzedelo, e os 'não-expostos' ou 'distante da fonte' a freguesia de São Tomé de Abação. Consideram-se estas duas freguesias por possuírem características urbanas similares e distinguem-se por uma ter elevada concentração de linhas e postes de alta tensão em seu território e a outra estar livre da passagem destas infraestruturas. Os testes audiométricos permitirão compreender de forma pormenorizada os impactes deste tipo de exposição na qualidade de vida da população, bem com, complementar outros eixos determinantes da pesquisa, nomeadamente, a componente mais objetiva, os níveis sonoros medidos, e a componente mais subjetiva, os inquéritos com questões relativas aos hábitos alimentares, estilo de vida, ambientes, exposição ao ruído e etc.

Os ensaios audiométricos serão realizados no Laboratório de Ergonomia da Universidade do Minho.

**Confidencialidade e Anonimato:** Todos os dados obtidos nesta pesquisa serão utilizados, unicamente, para fins académicos e permanecerão confidenciais.

Esta pesquisa tem como responsáveis a Dr<sup>a</sup>. Paula Remoaldo, Dr<sup>a</sup>. Lúgia Torres Silva e o Dr. Pedro Arezes, professores da Universidade do Minho e Juliana Araújo Alves aluna de doutoramento da referida universidade.

Eu, abaixo assinado(a), concordo em participar desta pesquisa. Declaro que fui devidamente informado(a) e esclarecido(a) sobre as etapas deste estudo, sobre os procedimentos e técnicas utilizados durante os ensaios. Foi-me ainda resguardado(a) a confidencialidade e o anonimato. Declaro que autorizo o uso das informações obtidas nos ensaios para fins científicos.

Assinatura:

Data: 16 / 11 / 2017

Henrique Henriquez de Silva Romão

### Avaliação da percepção da incomodidade devida ao ruído

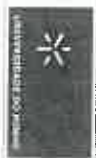

|                                                                                                                                           |                             |                   |         |                            |                 |                                  |                 |                            |
|-------------------------------------------------------------------------------------------------------------------------------------------|-----------------------------|-------------------|---------|----------------------------|-----------------|----------------------------------|-----------------|----------------------------|
| Nome completo                                                                                                                             | ANDRÉ CARLOS DA SILVA PIRES | Idade:            | 68      |                            |                 |                                  |                 |                            |
| Profissão atual                                                                                                                           | REPERTE                     | Há quantos anos?  | 13 ANOS |                            |                 |                                  |                 |                            |
| Profissão anterior                                                                                                                        | ARMADOR - RÊTIL             | Por quantos anos? | 44 ANOS |                            |                 |                                  |                 |                            |
| <b>Indique com (X) qual é o seu grau de concordância com cada uma das afirmações:</b>                                                     |                             |                   |         | <b>Discordo totalmente</b> | <b>Discordo</b> | <b>Não concordo nem discordo</b> | <b>Concordo</b> | <b>Concordo Totalmente</b> |
| 1. Eu normalmente ouço bem.                                                                                                               |                             |                   |         |                            |                 |                                  |                 | X                          |
| 2. Sinto-me incomodado(a) pelo ruído no meu dia-a-dia.                                                                                    |                             |                   |         |                            | X               |                                  |                 |                            |
| 3. O ruído tem afetado a minha vida (por exemplo: o sono e a concentração).                                                               |                             |                   |         |                            | X               |                                  |                 |                            |
| 4. Desperto facilmente ao mínimo ruído.                                                                                                   |                             |                   |         |                            |                 |                                  | X               |                            |
| 5. Habituo-me facilmente à maior parte dos ruídos.                                                                                        |                             |                   |         |                            |                 |                                  | X               |                            |
| 6. Sinto-me irritado(a) com o ruído.                                                                                                      |                             |                   |         |                            | X               |                                  |                 |                            |
| 7. Sinto-me incomodado(a) com o ruído proveniente do exterior da minha residência (por exemplo, da passagem dos veículos e dos vizinhos). |                             |                   |         |                            | X               |                                  |                 |                            |
| 8. Sinto dificuldade em concentrar-me em ambientes ruidosos.                                                                              |                             |                   |         |                            | X               |                                  |                 |                            |
| 9. Sinto dificuldade em relaxar em ambientes ruidosos.                                                                                    |                             |                   |         |                            | X               |                                  |                 |                            |
| 10. Tenho consciência acerca dos impactos do ruído na minha saúde.                                                                        |                             |                   |         |                            | X               |                                  |                 |                            |





Ensaio nº.: 05 Data: \_\_\_\_\_ Grupo:  Expostos  Não-expostos

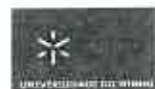

1. Que tipo de ruído escutou? (por exemplo: zumbido, faiscar).

zumbido

2. Como descreve o tipo de ruído que acabou de ouvir?

ZUMM ZUMM ZUMM

3. Pode descrever o tipo de incómodo que este ruído provoca? (por exemplo: fadiga, irritação, sonolência).

ASSUSTAR QUANDO O SOM ESTAVA MAIS ALTO

Obrigada pela sua participação!

MINI EXAME DO ESTADO MENTAL

2016/11/16

NOME: HOUÍQUE FERREIRA DE SILVA RINTO  
 IDADE: 68 Anos ESCOLARIDADE: 4º curso Data: 16/11/2016

1 - ORIENTAÇÃO (1 ponto por cada resposta correcta)

- Em que ano estamos? 0
- Em que mês estamos? 1
- Em que dia do mês estamos? 0
- Em que dia da semana estamos? 1
- Em que estação do ano estamos? 0
- Em que país estamos? 1
- Em que distrito vive? 1
- Em que terra vive? 1
- Em que casa estamos? 1
- Em que andar estamos? 0

Nota: 6

2 - RETENÇÃO (contar 1 ponto por cada resposta correctamente repetida)

"Vou dizer três palavras, queria que as repetisse mas só depois de eu as dizer todas; procure ficar a sabê-las de cor"

- Pêra 1
- Gato 1
- Bola 1

Nota: 3

3 - ATENÇÃO E CÁLCULO (contar 1 ponto por cada resposta correcta. Se der uma resposta errada mas depois continuar a subtrair bem, consideram-se as seguintes como correctas. Parar ao fim de 5 respostas.)

"Agora peço-lhe que me diga quantos são 30 menos 3 e depois ao número encontrado voltar a tirar 3 e repete assim até eu dizer para parar".

- 27 1 24 1 21 1 18 0 15 0

Nota: 3

4 - EVOCAÇÃO (1 ponto por cada resposta correcta.)

"Veja se consegue dizer as três palavras que pedi há pouco para decorar"

- Pêra 1
- Gato 1
- Bola 1

Nota: 3

## Termo de Consentimento Informado

**Título do Projeto:** Os impactes da poluição sonora de baixa frequência na qualidade de vida e na sustentabilidade dos lugares: estudo do tipo expostos e não-expostos no município de Guimarães.

**Enquadramento:** Esta investigação enquadra-se no âmbito de uma tese de doutoramento desenvolvida no Departamento de Geografia da Universidade do Minho.

### Explicação da Pesquisa:

Esta pesquisa tem por objetivo investigar quais os impactes do ruído de baixa frequência na qualidade de vida e na sustentabilidade dos lugares. A fonte de emissão que se considera para este estudo são os postes e linhas de alta tensão presentes em áreas residenciais no município de Guimarães, Portugal. Para aferir estes impactes consideram-se dois grupos de exposição: os 'expostos' ou 'próximo da fonte' a freguesia de Serzedelo, e os 'não-expostos' ou 'distante da fonte' a freguesia de São Tomé de Abação. Consideram-se estas duas freguesias por possuírem características urbanas similares e distinguem-se por uma ter elevada concentração de linhas e postes de alta tensão em seu território e a outra estar livre da passagem destas infraestruturas. Os testes audiométricos permitirão compreender de forma pormenorizada os impactes deste tipo de exposição na qualidade de vida da população, bem com, complementar outros eixos determinantes da pesquisa, nomeadamente, a componente mais objetiva, os níveis sonoros medidos, e a componente mais subjetiva, os inquéritos com questões relativas aos hábitos alimentares, estilo de vida, ambientes, exposição ao ruído e etc.

Os ensaios audiométricos serão realizados no Laboratório de Ergonomia da Universidade do Minho.

**Confidencialidade e Anonimato:** Todos os dados obtidos nesta pesquisa serão utilizados, unicamente, para fins académicos e permanecerão confidenciais.

Esta pesquisa tem como responsáveis a Dr.<sup>a</sup> Paula Remoaldo, Dr.<sup>a</sup> Lúgia Torres Silva e o Dr. Pedro Arezes, professores da Universidade do Minho e Juliana Araújo Alves aluna de doutoramento da referida universidade.

Eu, abaixo assinado(a), concordo em participar desta pesquisa. Declaro que fui devidamente informado(a) e esclarecido(a) sobre as etapas deste estudo, sobre os procedimentos e técnicas utilizados durante os ensaios. Foi-me ainda resguardado(a) a confidencialidade e o anonimato. Declaro que autorizo o uso das informações obtidas nos ensaios para fins científicos.

Assinatura: \_\_\_\_\_

Data: 2016 / 11 / 16

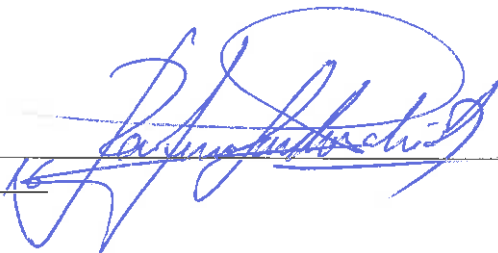

**Avaliação da percepção da incomodidade devida ao ruído**

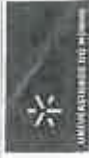

|                    |                           |  |  |                   |    |
|--------------------|---------------------------|--|--|-------------------|----|
| Nome completo      | Raul Jamul Cardoso Lixinh |  |  | Idade:            | 49 |
| Profissão atual    | Assistente Administrativo |  |  | Há quantos anos?  | 26 |
| Profissão anterior |                           |  |  | Por quantos anos? | —  |

| Indique com (X) qual é o seu grau de concordância com cada uma das afirmações:                                                            | Discordo totalmente | Discordo | Não concordo nem discordo | Concordo | Concordo Totalmente |
|-------------------------------------------------------------------------------------------------------------------------------------------|---------------------|----------|---------------------------|----------|---------------------|
| 1. Eu normalmente ouço bem.                                                                                                               |                     |          |                           |          | X                   |
| 2. Sinto-me incomodado(a) pelo ruído no meu dia-a-dia.                                                                                    |                     |          |                           |          | X                   |
| 3. O ruído tem afetado a minha vida (por exemplo: o sono e a concentração).                                                               |                     |          | X                         |          |                     |
| 4. Desperto facilmente ao mínimo ruído.                                                                                                   |                     |          |                           |          | X                   |
| 5. Habituo-me facilmente à maior parte dos ruídos.                                                                                        |                     |          | X                         |          |                     |
| 6. Sinto-me irritado(a) com o ruído.                                                                                                      |                     |          |                           |          | X                   |
| 7. Sinto-me incomodado(a) com o ruído proveniente do exterior da minha residência (por exemplo, da passagem dos veículos e dos vizinhos). |                     |          |                           |          | X                   |
| 8. Sinto dificuldade em concentrar-me em ambientes ruidosos.                                                                              |                     |          |                           |          | X                   |
| 9. Sinto dificuldade em relaxar em ambientes ruidosos.                                                                                    |                     |          |                           |          | X                   |
| 10. Tenho consciência acerca dos impactes do ruído na minha saúde.                                                                        |                     |          |                           |          | X                   |

Determinação do Limiar de Audição

Ensaio n.º: 06

Data: 16/11/15

Grupo:  Expostos  Não-Expostos

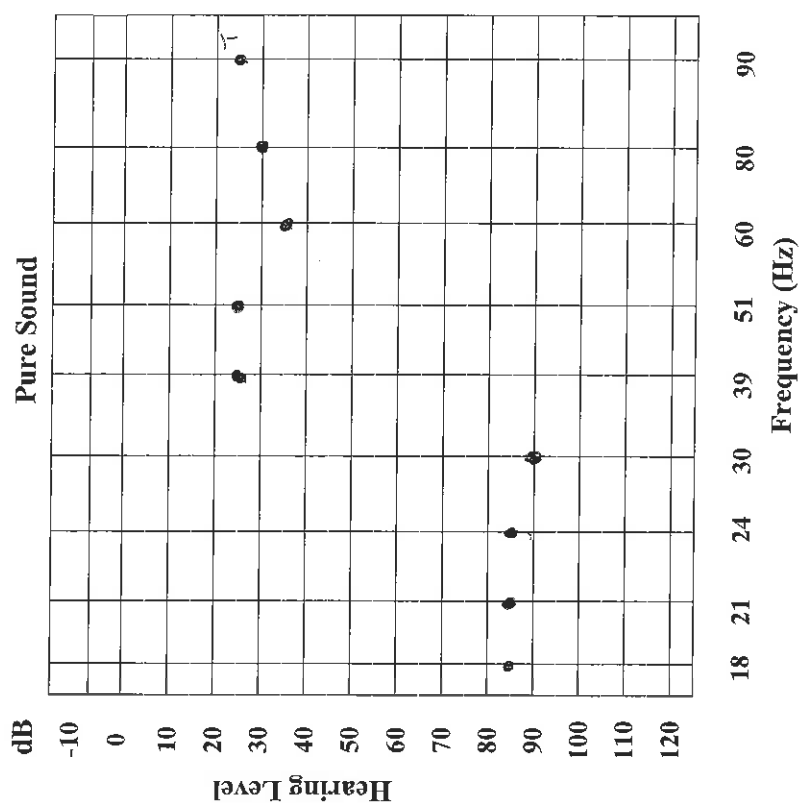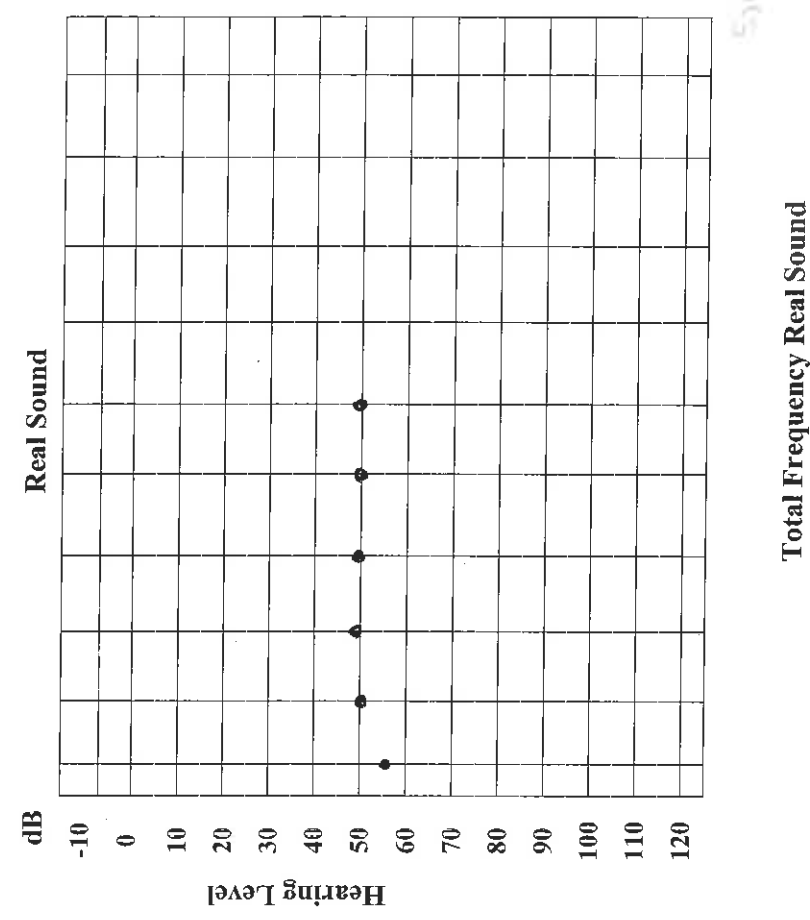

18 21 24 30 39 51 60 80 90  
Frequency (Hz)

Total Frequency Real Sound

Distúrbios devido ao ouvido externo e médio/intermédio  
 Odeíte  
 Problema com auscultação

Ensaio n°: 06 Data: \_\_\_\_\_ Grupo:  Expostos  Não-expostos

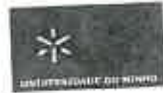

1. Que tipo de ruído escutou? (por exemplo: zumbido, faiscar).

os dois e uns estalos

2. Como descreve o tipo de ruído que acabou de ouvir?

ruído tipo brisa, tipo estalos e som de uma  
lousa.

3. Pode descrever o tipo de incómodo que este ruído provoca? (por exemplo: fadiga, irritação, sonolência).

O tipo de incómodo mais marcante foi a sonolência

Obrigada pela sua participação!

# MINI EXAME DO ESTADO MENTAL

NOME: RAEL WALTER CARLOS BIXOTO  
IDADE: 49 Anos ESCOLARIDADE: UNIVERSITARIO Data: 16/11/2016

- 1 - ORIENTAÇÃO (1 ponto por cada resposta correcta)
- Em que ano estamos? 16
  - Em que mês estamos? 11
  - Em que dia do mês estamos? 16
  - Em que dia da semana estamos? domingo
  - Em que estação do ano estamos? inverno
  - Em que país estamos? Brasil
  - Em que distrito vive? Alfama
  - Em que terra vive? Lisboa
  - Em que casa estamos? 10
  - Em que andar estamos? 1

Nota: 10

- 2 - RETENÇÃO (contar 1 ponto por cada resposta correctamente repetida)  
"Vou dizer três palavras, queria que as repetisse mas só depois de eu as dizer todas; procure ficar a sabê-las de cor"
- Pêra 1
  - Gato 1
  - Bola 1

Nota: 3

- 3 - ATENÇÃO E CÁLCULO (contar 1 ponto por cada resposta correcta. Se der uma resposta errada mas depois continuar a subtrair bem, consideram-se as seguintes como correctas. Parar ao fim de 5 respostas.)  
"Agora peço-lhe que me diga quantos são 30 menos 3 e depois ao número encontrado voltar a tirar 3 e repete assim até eu dizer para parar".
- 27 1 24 0 21 0 18 0 15 1

Nota: 2

- 4 - EVOCAÇÃO (1 ponto por cada resposta correcta.)  
"Veja se consegue dizer as três palavras que pedi há pouco para decorar"
- Pêra 1
  - Gato 1
  - Bola 0

Nota: 2

## Termo de Consentimento Informado

**Título do Projeto:** Os impactes da poluição sonora de baixa frequência na qualidade de vida e na sustentabilidade dos lugares: estudo do tipo expostos e não-expostos no município de Guimarães.

**Enquadramento:** Esta investigação enquadra-se no âmbito de uma tese de doutoramento desenvolvida no Departamento de Geografia da Universidade do Minho.

**Explicação da Pesquisa:**

Esta pesquisa tem por objetivo investigar quais os impactes do ruído de baixa frequência na qualidade de vida e na sustentabilidade dos lugares. A fonte de emissão que se considera para este estudo são os postes e linhas de alta tensão presentes em áreas residenciais no município de Guimarães, Portugal. Para aferir estes impactes consideram-se dois grupos de exposição: os 'expostos' ou 'próximo da fonte' a freguesia de Serzedelo, e os 'não-expostos' ou 'distante da fonte' a freguesia de São Tomé de Abação. Consideram-se estas duas freguesias por possuírem características urbanas similares e distinguem-se por uma ter elevada concentração de linhas e postes de alta tensão em seu território e a outra estar livre da passagem destas infraestruturas. Os testes audiométricos permitirão compreender de forma pormenorizada os impactes deste tipo de exposição na qualidade de vida da população, bem com, complementar outros eixos determinantes da pesquisa, nomeadamente, a componente mais objetiva, os níveis sonoros medidos, e a componente mais subjetiva, os inquéritos com questões relativas aos hábitos alimentares, estilo de vida, ambientes, exposição ao ruído e etc. Os ensaios audiométricos serão realizados no Laboratório de Ergonomia da Universidade do Minho.

**Confidencialidade e Anonimato:** Todos os dados obtidos nesta pesquisa serão utilizados, unicamente, para fins académicos e permanecerão confidenciais.

Esta pesquisa tem como responsáveis a Dr<sup>a</sup>. Paula Remoaldo, Dr<sup>a</sup>. Lígia Torres Silva e o Dr. Pedro Arezes, professores da Universidade do Minho e Juliana Araújo Alves aluna de doutoramento da referida universidade.

Eu, abaixo assinado(a), concordo em participar desta pesquisa. Declaro que fui devidamente informado(a) e esclarecido(a) sobre as etapas deste estudo, sobre os procedimentos e técnicas utilizados durante os ensaios. Foi-me ainda resguardado(a) a confidencialidade e o anonimato. Declaro que autorizo o uso das informações obtidas nos ensaios para fins científicos.

Assinatura:

Data: 16/11/2016

*António Machado Pereira*



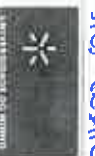

### Avaliação da percepção da incomodidade devida ao ruído

|                                                                                                                                           |                         |  |  |                   |                                     |                                     |                                     |                                  |
|-------------------------------------------------------------------------------------------------------------------------------------------|-------------------------|--|--|-------------------|-------------------------------------|-------------------------------------|-------------------------------------|----------------------------------|
| Nome completo                                                                                                                             | Antonio Machado Correia |  |  | Idade:            | 63                                  |                                     |                                     |                                  |
| Profissão atual                                                                                                                           | Reformado               |  |  | Há quantos anos?  | 4 anos                              |                                     |                                     |                                  |
| Profissão anterior                                                                                                                        | estremador Textil       |  |  | Por quantos anos? | 44 anos                             |                                     |                                     |                                  |
| <b>Indique com (X) qual é o seu grau de concordância com cada uma das afirmações:</b>                                                     |                         |  |  |                   |                                     |                                     |                                     |                                  |
| 1. Eu normalmente ouço bem.                                                                                                               |                         |  |  |                   | <input checked="" type="checkbox"/> |                                     |                                     |                                  |
| 2. Sinto-me incomodado(a) pelo ruído no meu dia-a-dia.                                                                                    |                         |  |  |                   |                                     | <input checked="" type="checkbox"/> |                                     |                                  |
| 3. O ruído tem afetado a minha vida (por exemplo: o sono e a concentração).                                                               |                         |  |  |                   |                                     |                                     | <input checked="" type="checkbox"/> |                                  |
| 4. Desperto facilmente ao mínimo ruído.                                                                                                   |                         |  |  |                   |                                     | <input checked="" type="checkbox"/> |                                     |                                  |
| 5. Habituo-me facilmente à maior parte dos ruídos.                                                                                        |                         |  |  |                   | <input checked="" type="checkbox"/> |                                     |                                     |                                  |
| 6. Sinto-me irritado(a) com o ruído.                                                                                                      |                         |  |  |                   |                                     |                                     | <input checked="" type="checkbox"/> |                                  |
| 7. Sinto-me incomodado(a) com o ruído proveniente do exterior da minha residência (por exemplo, da passagem dos veículos e dos vizinhos). |                         |  |  |                   |                                     | <input checked="" type="checkbox"/> |                                     |                                  |
| 8. Sinto dificuldade em concentrar-me em ambientes ruidosos.                                                                              |                         |  |  |                   |                                     |                                     | <input checked="" type="checkbox"/> |                                  |
| 9. Sinto dificuldade em relaxar em ambientes ruidosos.                                                                                    |                         |  |  |                   |                                     |                                     | <input checked="" type="checkbox"/> |                                  |
| 10. Tenho consciência acerca dos impactes do ruído na minha saúde.                                                                        |                         |  |  |                   |                                     |                                     | <input checked="" type="checkbox"/> |                                  |
|                                                                                                                                           |                         |  |  |                   |                                     |                                     |                                     | <b>Discordo totalmente</b>       |
|                                                                                                                                           |                         |  |  |                   |                                     |                                     |                                     | <b>Discordo</b>                  |
|                                                                                                                                           |                         |  |  |                   |                                     |                                     |                                     | <b>Não concordo nem discordo</b> |
|                                                                                                                                           |                         |  |  |                   |                                     |                                     |                                     | <b>Concordo</b>                  |
|                                                                                                                                           |                         |  |  |                   |                                     |                                     |                                     | <b>Concordo totalmente</b>       |

Determinação do Limiar de Audição

Ensaio n.º: 07 Data: \_\_\_\_\_

Grupo:  Expostos  Não-Expostos

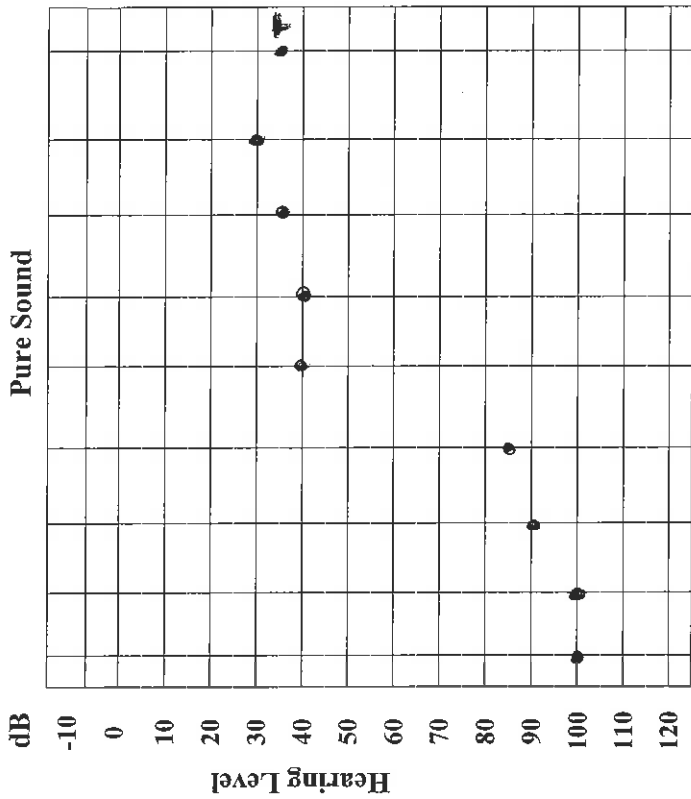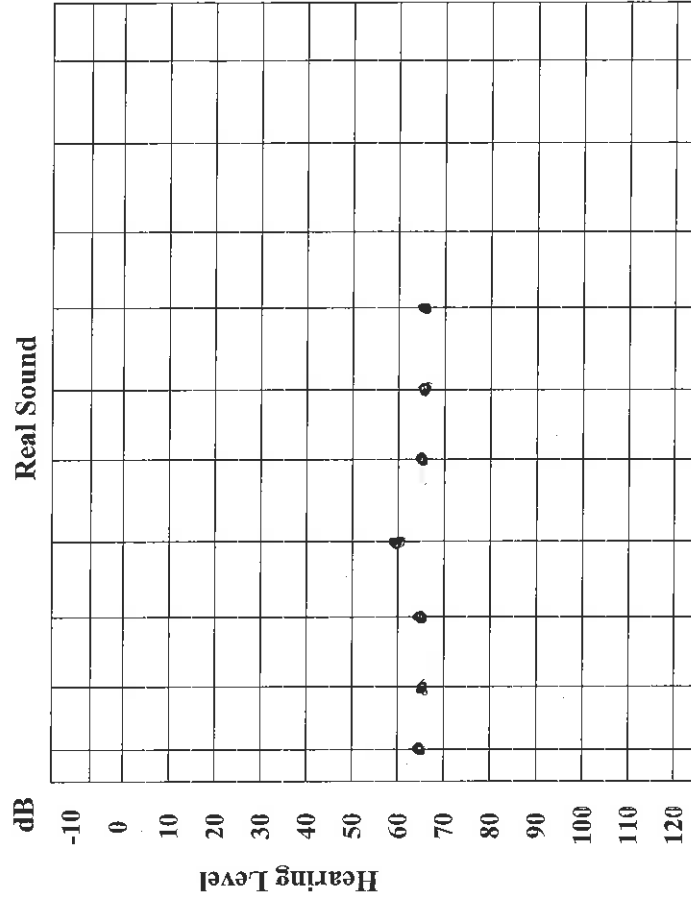

18 21 24 30 39 51 60 80 90  
Frequency (Hz)

Total Frequency Real Sound

Devido ao ruído de 18 Hz por falta de 101 dB no ambiente  
Foi feita 100 ou 101 dB

Ensaio nº.: 07 Data: 16/11/2016 Grupo:  Expostos  Não-expostos

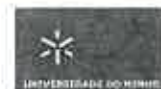

1. Que tipo de ruído escutou? (por exemplo: zumbido, faiscar).

Zumbido e Faiscar

2. Como descreve o tipo de ruído que acabou de ouvir?

um Ruído um pouco incómodo

3. Pode descrever o tipo de incómodo que este ruído provoca? (por exemplo: fadiga, irritação, sonolência).

Fadiga e irritação

Obrigada pela sua participação!

## MINI EXAME DO ESTADO MENTAL

NOME: ANTÔNIO UCHIAS PEREIRA

IDADE: 63 Anos ESCOLARIDADE: 3º ano Data: 16/11/2016

### 1 - ORIENTAÇÃO (1 ponto por cada resposta correcta)

Em que ano estamos? 1  
Em que mês estamos? 1  
Em que dia do mês estamos? 0  
Em que dia da semana estamos? 1  
Em que estação do ano estamos? 1  
Em que país estamos? 1  
Em que distrito vive? 1  
Em que terra vive? 1  
Em que casa estamos? 1  
Em que andar estamos? 0

Nota: 8

### 2 - RETENÇÃO (contar 1 ponto por cada resposta correctamente repetida)

"Vou dizer três palavras, queria que as repetisse mas só depois de eu as dizer todas; procure ficar a sabê-las de cor"

Pêra 1  
Gaio 1  
Bola 1

Nota: 3

### 3 - ATENÇÃO E CÁLCULO (contar 1 ponto por cada resposta correcta. Se der uma resposta errada mas depois continuar a subtrair bem, consideram-se as seguintes como correctas. Parar ao fim de 5 respostas.)

"Agora peça-lhe que me diga quantos são 30 menos 3 e depois ao número encontrado voltar a tirar 3 e repete assim até eu dizer para parar".

27 1 24 1 21 1 18 1 15 1

Nota: 5

### 4 - EVOCAÇÃO (1 ponto por cada resposta correcta.)

"Veja se consegue dizer as três palavras que pedi há pouco para decorar"

Pêra 1  
Gato 1  
Bola 0

Nota: 2

## Termo de Consentimento Informado

**Título do Projeto:** Os impactes da poluição sonora de baixa frequência na qualidade de vida e na sustentabilidade dos lugares: estudo do tipo expostos e não-expostos no município de Guimarães.

**Enquadramento:** Esta investigação enquadra-se no âmbito de uma tese de doutoramento desenvolvida no Departamento de Geografia da Universidade do Minho.

### Explicação da Pesquisa:

Esta pesquisa tem por objetivo investigar quais os impactes do ruído de baixa frequência na qualidade de vida e na sustentabilidade dos lugares. A fonte de emissão que se considera para este estudo são os postes e linhas de alta tensão presentes em áreas residenciais no município de Guimarães, Portugal. Para aferir estes impactes consideram-se dois grupos de exposição: os 'expostos' ou 'próximo da fonte' a freguesia de Serzedelo, e os 'não-expostos' ou 'distante da fonte' a freguesia de São Tomé de Abação. Consideram-se estas duas freguesias por possuírem características urbanas similares e distinguem-se por uma ter elevada concentração de linhas e postes de alta tensão em seu território e a outra estar livre da passagem destas infraestruturas. Os testes audiométricos permitirão compreender de forma pormenorizada os impactes deste tipo de exposição na qualidade de vida da população, bem com, complementar outros eixos determinantes da pesquisa, nomeadamente, a componente mais objetiva, os níveis sonoros medidos, e a componente mais subjetiva, os inquéritos com questões relativas aos hábitos alimentares, estilo de vida, ambientes, exposição ao ruído e etc.

Os ensaios audiométricos serão realizados no Laboratório de Ergonomia da Universidade do Minho.

**Confidencialidade e Anonimato:** Todos os dados obtidos nesta pesquisa serão utilizados, unicamente, para fins académicos e permanecerão confidenciais.

Esta pesquisa tem como responsáveis a Dr<sup>a</sup>. Paula Remoaldo, Dr<sup>a</sup>. Lúcia Torres Silva e o Dr. Pedro Arezes, professores da Universidade do Minho e Juliana Araújo Alves aluna de doutoramento da referida universidade.

Eu, abaixo assinado(a), concordo em participar desta pesquisa. Declaro que fui devidamente informado(a) e esclarecido(a) sobre as etapas deste estudo, sobre os procedimentos e técnicas utilizados durante os ensaios. Foi-me ainda resguardado(a) a confidencialidade e o anonimato. Declaro que autorizo o uso das informações obtidas nos ensaios para fins científicos.

Assinatura:

Data:

*Paula Remoaldo / Lúcia Torres Silva*  
\_\_\_\_\_  
16 / 12 / 2016

### Avaliação da percepção da incomodidade devida ao ruído

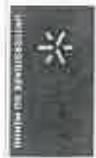

|                                                                                                                                           |                        |          |                           |          |                     |
|-------------------------------------------------------------------------------------------------------------------------------------------|------------------------|----------|---------------------------|----------|---------------------|
| Nome completo                                                                                                                             | Vagner / Aires Silva   |          | Idade:                    | 50       |                     |
| Profissão atual                                                                                                                           | Arquiteto / Engenheiro |          | Há quantos anos?          | 26       |                     |
| Profissão anterior                                                                                                                        | Dir. Tor. P.           |          | Por quantos anos?         | 20       |                     |
| <b>Indique com (X) qual é o seu grau de concordância com cada uma das afirmações:</b>                                                     |                        |          |                           |          |                     |
| 1. Eu normalmente ouço bem.                                                                                                               | Discordo totalmente    | Discordo | Não concordo nem discordo | Concordo | Concordo Totalmente |
| 2. Sinto-me incomodado(a) pelo ruído no meu dia-a-dia.                                                                                    |                        | X        |                           | X        |                     |
| 3. O ruído tem afetado a minha vida (por exemplo: o sono e a concentração).                                                               |                        |          |                           | X        |                     |
| 4. Desperto facilmente ao mínimo ruído.                                                                                                   |                        |          |                           | X        |                     |
| 5. Habituo-me facilmente à maior parte dos ruídos.                                                                                        |                        |          | X                         |          |                     |
| 6. Sinto-me irritado(a) com o ruído.                                                                                                      |                        |          |                           | X        |                     |
| 7. Sinto-me incomodado(a) com o ruído proveniente do exterior da minha residência (por exemplo, da passagem dos veículos e dos vizinhos). |                        |          |                           | X        |                     |
| 8. Sinto dificuldade em concentrar-me em ambientes ruidosos.                                                                              |                        |          |                           | X        |                     |
| 9. Sinto dificuldade em relaxar em ambientes ruidosos.                                                                                    |                        |          |                           | X        |                     |
| 10. Tenho consciência acerca dos impactes do ruído na minha saúde.                                                                        |                        |          |                           |          | X                   |



Ensaio n°.: 08 Data: 16/11/2016 Grupo:  Expostos  Não-expostos

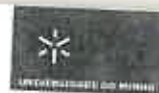

1. Que tipo de ruído escutou? (por exemplo: zumbido, faiscar).

Zumbido

2. Como descreve o tipo de ruído que acabou de ouvir?

Pouco incómodo

3. Pode descrever o tipo de incómodo que este ruído provoca? (por exemplo: fadiga, irritação, sonolência).

Irritação

Obrigada pela sua participação!



## MINI EXAME DO ESTADO MENTAL

NOME: MANUEL ALVES SILVA  
IDADE: 50 Anos ESCOLARIDADE: 11º ano Data: 16/11/2016

### 1 - ORIENTAÇÃO (1 ponto por cada resposta correcta)

- Em que ano estamos? 1
- Em que mês estamos? 1
- Em que dia do mês estamos? 1
- Em que dia da semana estamos? 1
- Em que estação do ano estamos? 1
- Em que país estamos? 1
- Em que distrito vive? 1
- Em que terra vive? 1
- Em que casa estamos? 1
- Em que andar estamos? 1

Nota: 10

### 2 - RETENÇÃO (contar 1 ponto por cada resposta correctamente repetida)

"Vou dizer três palavras, queria que as repetisse mas só depois de eu as dizer todas; procure ficar a sabê-las de cor"

- Pêra 1
- Gato 1
- Bola 1

Nota: 3

### 3 - ATENÇÃO E CÁLCULO (contar 1 ponto por cada resposta correcta. Se der uma resposta errada mas depois continuar a subtrair bem, consideram-se as seguintes como correctas. Parar ao fim de 5 respostas.)

"Agora peço-lhe que me diga quantos são 30 menos 3 e depois ao número encontrado voltar a tirar 3 e repete assim até eu dizer para parar".

- 27 1 24 1 21 1 18 0 15 1

Nota: 4

### 4 - EVOCAÇÃO (1 ponto por cada resposta correcta.)

"Veja se consegue dizer as três palavras que pedi há pouco para decorar".

- Pêra 1
- Gato 1
- Bola 0

Nota: 2
